# Supplementary material for: In silico analysis reveals a shared immune signature in CASP8-mutated carcinomas with varying correlations to prognosis
Source: PeerJ. 2019 Feb 11;7:e6402. doi: 10.7717/peerj.6402 (PMC6375258; doi:10.7717/peerj.6402)
Supplement: Table S1 — The table lists HNSC and UCEC cases from TCGA analyzed in the study, along with the status of CASP8 mutation, availability of gene expression data, ICD-10-CM code and site of tumor. [file peerj-07-6402-s003.xlsx]

## Sheet: HNSCs used in this study, n=424
Supplemental Table S1. List of HNSC tumours used in this study. The table lists HNSC cases from TCGA analyzed in the study, along with the status of CASP8 mutation, availability of gene expression data, ICD-10-CM code and site of tumor.
Case Barcode	CASP8 Status	Gene Expression File	ICD-10-CM Code	Site
TCGA-CV-A468	Mutant	Yes	c00.9	Malignant neoplasm of lip, unspecified
TCGA-CV-6943	Mutant	Yes	c01	Malignant neoplasm of base of tongue
TCGA-BA-6873	Mutant	Yes	c02.9	Malignant neoplasm of tongue, unspecified
TCGA-CN-A642	Mutant	Yes	c02.9	Malignant neoplasm of tongue, unspecified
TCGA-CQ-5327	Mutant	Yes	c02.9	Malignant neoplasm of tongue, unspecified
TCGA-CQ-5333	Mutant	Yes	c02.9	Malignant neoplasm of tongue, unspecified
TCGA-CR-7382	Mutant	Yes	c02.9	Malignant neoplasm of tongue, unspecified
TCGA-CV-6436	Mutant	Yes	c02.9	Malignant neoplasm of tongue, unspecified
TCGA-CV-7243	Mutant	Yes	c02.9	Malignant neoplasm of tongue, unspecified
TCGA-CV-A45P	Mutant	Yes	c02.9	Malignant neoplasm of tongue, unspecified
TCGA-CV-A6JO	Mutant	Yes	c02.9	Malignant neoplasm of tongue, unspecified
TCGA-CX-7085	Mutant	Yes	c02.9	Malignant neoplasm of tongue, unspecified
TCGA-IQ-A61L	Mutant	Yes	c02.9	Malignant neoplasm of tongue, unspecified
TCGA-CV-A45O	Mutant	Yes	c03.9	Malignant neoplasm of gum, unspecified
TCGA-T2-A6X2	Mutant	Yes	c03.9	Malignant neoplasm of gum, unspecified
TCGA-MT-A67D	Mutant	Yes	c04.0	Malignant neoplasm of anterior floor of mouth
TCGA-BA-5556	Mutant	Yes	c04.9	Malignant neoplasm of floor of mouth, unspecified
TCGA-CV-6953	Mutant	Yes	c04.9	Malignant neoplasm of floor of mouth, unspecified
TCGA-CV-A463	Mutant	Yes	c04.9	Malignant neoplasm of floor of mouth, unspecified
TCGA-CV-A6JD	Mutant	Yes	c04.9	Malignant neoplasm of floor of mouth, unspecified
TCGA-QK-A64Z	Mutant	Yes	c04.9	Malignant neoplasm of floor of mouth, unspecified
TCGA-QK-A6VB	Mutant	Yes	c04.9	Malignant neoplasm of floor of mouth, unspecified
TCGA-T2-A6WX	Mutant	Yes	c04.9	Malignant neoplasm of floor of mouth, unspecified
TCGA-UF-A7JO	Mutant	Yes	c04.9	Malignant neoplasm of floor of mouth, unspecified
TCGA-CN-5369	Mutant	Yes	c05.0	Malignant neoplasm of hard palate
TCGA-BA-5151	Mutant	Yes	c06.0	Malignant neoplasm of cheek mucosa
TCGA-CN-4734	Mutant	Yes	c06.0	Malignant neoplasm of cheek mucosa
TCGA-CQ-5334	Mutant	Yes	c06.0	Malignant neoplasm of cheek mucosa
TCGA-D6-A6EN	Mutant	Yes	c06.0	Malignant neoplasm of cheek mucosa
TCGA-F7-A624	Mutant	Yes	c06.0	Malignant neoplasm of cheek mucosa
TCGA-H7-8501	Mutant	Yes	c06.0	Malignant neoplasm of cheek mucosa
TCGA-HD-A4C1	Mutant	Yes	c06.0	Malignant neoplasm of cheek mucosa
TCGA-P3-A6T2	Mutant	Yes	c06.0	Malignant neoplasm of cheek mucosa
TCGA-QK-A6IG	Mutant	Yes	c06.0	Malignant neoplasm of cheek mucosa
TCGA-CQ-7071	Mutant	Yes	c06.9	Malignant neoplasm of mouth, unspecified
TCGA-CV-A45V	Mutant	Yes	c06.9	Malignant neoplasm of mouth, unspecified
TCGA-CV-A6K2	Mutant	Yes	c06.9	Malignant neoplasm of mouth, unspecified
TCGA-MT-A67F	Mutant	Yes	c06.9	Malignant neoplasm of mouth, unspecified
TCGA-RS-A6TO	Mutant	Yes	c06.9	Malignant neoplasm of mouth, unspecified
TCGA-CQ-5324	Mutant	Yes	c14.8	Malignant neoplasm of overlapping sites of lip
TCGA-CQ-5331	Mutant	Yes	c14.8	Malignant neoplasm of overlapping sites of lip
TCGA-CQ-6220	Mutant	Yes	c14.8	Malignant neoplasm of overlapping sites of lip
TCGA-CQ-7068	Mutant	Yes	c14.8	Malignant neoplasm of overlapping sites of lip
TCGA-CR-7379	Mutant	Yes	c14.8	Malignant neoplasm of overlapping sites of lip
TCGA-CR-7395	Mutant	Yes	c14.8	Malignant neoplasm of overlapping sites of lip
TCGA-CV-5966	Mutant	Yes	c14.8	Malignant neoplasm of overlapping sites of lip
TCGA-CV-6938	Mutant	Yes	c14.8	Malignant neoplasm of overlapping sites of lip
TCGA-CV-7095	Mutant	Yes	c14.8	Malignant neoplasm of overlapping sites of lip
TCGA-CV-7099	Mutant	Yes	c14.8	Malignant neoplasm of overlapping sites of lip
TCGA-CV-7252	Mutant	Yes	c14.8	Malignant neoplasm of overlapping sites of lip
TCGA-CV-7413	Mutant	Yes	c14.8	Malignant neoplasm of overlapping sites of lip
TCGA-CV-7425	Mutant	Yes	c14.8	Malignant neoplasm of overlapping sites of lip
TCGA-CR-7402	Mutant	Yes	c32.9	Malignant neoplasm of larynx, unspecified
TCGA-CV-A6JM	Mutant	No	c32.9	Malignant neoplasm of larynx, unspecified
TCGA-D6-A6EK	Mutant	No	c32.9	Malignant neoplasm of larynx, unspecified
TCGA-D6-6516	Wild-type	Yes	c00.9	Malignant neoplasm of lip, unspecified
TCGA-D6-6827	Wild-type	Yes	c00.9	Malignant neoplasm of lip, unspecified
TCGA-BA-6871	Wild-type	Yes	c01	Malignant neoplasm of base of tongue
TCGA-BB-7871	Wild-type	Yes	c01	Malignant neoplasm of base of tongue
TCGA-CR-6477	Wild-type	Yes	c01	Malignant neoplasm of base of tongue
TCGA-CV-5439	Wild-type	Yes	c01	Malignant neoplasm of base of tongue
TCGA-CV-6950	Wild-type	Yes	c01	Malignant neoplasm of base of tongue
TCGA-F7-A61V	Wild-type	Yes	c01	Malignant neoplasm of base of tongue
TCGA-F7-A620	Wild-type	Yes	c01	Malignant neoplasm of base of tongue
TCGA-HD-8224	Wild-type	Yes	c01	Malignant neoplasm of base of tongue
TCGA-IQ-A61O	Wild-type	Yes	c01	Malignant neoplasm of base of tongue
TCGA-MZ-A7D7	Wild-type	Yes	c01	Malignant neoplasm of base of tongue
TCGA-T2-A6WZ	Wild-type	Yes	c01	Malignant neoplasm of base of tongue
TCGA-4P-AA8J	Wild-type	Yes	c02.9	Malignant neoplasm of tongue, unspecified
TCGA-BA-4074	Wild-type	Yes	c02.9	Malignant neoplasm of tongue, unspecified
TCGA-BA-4075	Wild-type	Yes	c02.9	Malignant neoplasm of tongue, unspecified
TCGA-BA-A6DB	Wild-type	Yes	c02.9	Malignant neoplasm of tongue, unspecified
TCGA-BA-A6DE	Wild-type	Yes	c02.9	Malignant neoplasm of tongue, unspecified
TCGA-BA-A6DG	Wild-type	Yes	c02.9	Malignant neoplasm of tongue, unspecified
TCGA-BB-4224	Wild-type	Yes	c02.9	Malignant neoplasm of tongue, unspecified
TCGA-BB-7863	Wild-type	Yes	c02.9	Malignant neoplasm of tongue, unspecified
TCGA-BB-A6UO	Wild-type	Yes	c02.9	Malignant neoplasm of tongue, unspecified
TCGA-C9-A47Z	Wild-type	Yes	c02.9	Malignant neoplasm of tongue, unspecified
TCGA-C9-A480	Wild-type	Yes	c02.9	Malignant neoplasm of tongue, unspecified
TCGA-CN-4725	Wild-type	Yes	c02.9	Malignant neoplasm of tongue, unspecified
TCGA-CN-4733	Wild-type	Yes	c02.9	Malignant neoplasm of tongue, unspecified
TCGA-CN-4736	Wild-type	Yes	c02.9	Malignant neoplasm of tongue, unspecified
TCGA-CN-4737	Wild-type	Yes	c02.9	Malignant neoplasm of tongue, unspecified
TCGA-CN-4742	Wild-type	Yes	c02.9	Malignant neoplasm of tongue, unspecified
TCGA-CN-5367	Wild-type	Yes	c02.9	Malignant neoplasm of tongue, unspecified
TCGA-CN-5370	Wild-type	Yes	c02.9	Malignant neoplasm of tongue, unspecified
TCGA-CN-6016	Wild-type	Yes	c02.9	Malignant neoplasm of tongue, unspecified
TCGA-CN-6017	Wild-type	Yes	c02.9	Malignant neoplasm of tongue, unspecified
TCGA-CN-6019	Wild-type	Yes	c02.9	Malignant neoplasm of tongue, unspecified
TCGA-CN-6024	Wild-type	Yes	c02.9	Malignant neoplasm of tongue, unspecified
TCGA-CN-6996	Wild-type	Yes	c02.9	Malignant neoplasm of tongue, unspecified
TCGA-CN-6998	Wild-type	Yes	c02.9	Malignant neoplasm of tongue, unspecified
TCGA-CN-A498	Wild-type	Yes	c02.9	Malignant neoplasm of tongue, unspecified
TCGA-CN-A640	Wild-type	Yes	c02.9	Malignant neoplasm of tongue, unspecified
TCGA-CQ-5325	Wild-type	Yes	c02.9	Malignant neoplasm of tongue, unspecified
TCGA-CQ-5329	Wild-type	Yes	c02.9	Malignant neoplasm of tongue, unspecified
TCGA-CQ-5330	Wild-type	Yes	c02.9	Malignant neoplasm of tongue, unspecified
TCGA-CQ-6218	Wild-type	Yes	c02.9	Malignant neoplasm of tongue, unspecified
TCGA-CQ-6219	Wild-type	Yes	c02.9	Malignant neoplasm of tongue, unspecified
TCGA-CQ-6221	Wild-type	Yes	c02.9	Malignant neoplasm of tongue, unspecified
TCGA-CQ-6222	Wild-type	Yes	c02.9	Malignant neoplasm of tongue, unspecified
TCGA-CQ-6224	Wild-type	Yes	c02.9	Malignant neoplasm of tongue, unspecified
TCGA-CQ-6229	Wild-type	Yes	c02.9	Malignant neoplasm of tongue, unspecified
TCGA-CQ-7065	Wild-type	Yes	c02.9	Malignant neoplasm of tongue, unspecified
TCGA-CQ-7072	Wild-type	Yes	c02.9	Malignant neoplasm of tongue, unspecified
TCGA-CR-6488	Wild-type	Yes	c02.9	Malignant neoplasm of tongue, unspecified
TCGA-CR-6493	Wild-type	Yes	c02.9	Malignant neoplasm of tongue, unspecified
TCGA-CR-7372	Wild-type	Yes	c02.9	Malignant neoplasm of tongue, unspecified
TCGA-CR-7390	Wild-type	Yes	c02.9	Malignant neoplasm of tongue, unspecified
TCGA-CR-7391	Wild-type	Yes	c02.9	Malignant neoplasm of tongue, unspecified
TCGA-CR-7392	Wild-type	Yes	c02.9	Malignant neoplasm of tongue, unspecified
TCGA-CR-7393	Wild-type	Yes	c02.9	Malignant neoplasm of tongue, unspecified
TCGA-CR-7394	Wild-type	Yes	c02.9	Malignant neoplasm of tongue, unspecified
TCGA-CR-7397	Wild-type	Yes	c02.9	Malignant neoplasm of tongue, unspecified
TCGA-CR-7401	Wild-type	Yes	c02.9	Malignant neoplasm of tongue, unspecified
TCGA-CV-5970	Wild-type	Yes	c02.9	Malignant neoplasm of tongue, unspecified
TCGA-CV-5973	Wild-type	Yes	c02.9	Malignant neoplasm of tongue, unspecified
TCGA-CV-5976	Wild-type	Yes	c02.9	Malignant neoplasm of tongue, unspecified
TCGA-CV-5977	Wild-type	Yes	c02.9	Malignant neoplasm of tongue, unspecified
TCGA-CV-5979	Wild-type	Yes	c02.9	Malignant neoplasm of tongue, unspecified
TCGA-CV-6003	Wild-type	Yes	c02.9	Malignant neoplasm of tongue, unspecified
TCGA-CV-6441	Wild-type	Yes	c02.9	Malignant neoplasm of tongue, unspecified
TCGA-CV-6933	Wild-type	Yes	c02.9	Malignant neoplasm of tongue, unspecified
TCGA-CV-6934	Wild-type	Yes	c02.9	Malignant neoplasm of tongue, unspecified
TCGA-CV-6941	Wild-type	Yes	c02.9	Malignant neoplasm of tongue, unspecified
TCGA-CV-6945	Wild-type	Yes	c02.9	Malignant neoplasm of tongue, unspecified
TCGA-CV-6951	Wild-type	Yes	c02.9	Malignant neoplasm of tongue, unspecified
TCGA-CV-6952	Wild-type	Yes	c02.9	Malignant neoplasm of tongue, unspecified
TCGA-CV-6954	Wild-type	Yes	c02.9	Malignant neoplasm of tongue, unspecified
TCGA-CV-6956	Wild-type	Yes	c02.9	Malignant neoplasm of tongue, unspecified
TCGA-CV-6959	Wild-type	Yes	c02.9	Malignant neoplasm of tongue, unspecified
TCGA-CV-7103	Wild-type	Yes	c02.9	Malignant neoplasm of tongue, unspecified
TCGA-CV-7104	Wild-type	Yes	c02.9	Malignant neoplasm of tongue, unspecified
TCGA-CV-7180	Wild-type	Yes	c02.9	Malignant neoplasm of tongue, unspecified
TCGA-CV-7236	Wild-type	Yes	c02.9	Malignant neoplasm of tongue, unspecified
TCGA-CV-7238	Wild-type	Yes	c02.9	Malignant neoplasm of tongue, unspecified
TCGA-CV-7255	Wild-type	Yes	c02.9	Malignant neoplasm of tongue, unspecified
TCGA-CV-7438	Wild-type	Yes	c02.9	Malignant neoplasm of tongue, unspecified
TCGA-CV-7446	Wild-type	Yes	c02.9	Malignant neoplasm of tongue, unspecified
TCGA-CV-A45R	Wild-type	Yes	c02.9	Malignant neoplasm of tongue, unspecified
TCGA-CV-A45T	Wild-type	Yes	c02.9	Malignant neoplasm of tongue, unspecified
TCGA-CV-A465	Wild-type	Yes	c02.9	Malignant neoplasm of tongue, unspecified
TCGA-CV-A6JT	Wild-type	Yes	c02.9	Malignant neoplasm of tongue, unspecified
TCGA-CV-A6JU	Wild-type	Yes	c02.9	Malignant neoplasm of tongue, unspecified
TCGA-CV-A6K0	Wild-type	Yes	c02.9	Malignant neoplasm of tongue, unspecified
TCGA-D6-6515	Wild-type	Yes	c02.9	Malignant neoplasm of tongue, unspecified
TCGA-D6-6823	Wild-type	Yes	c02.9	Malignant neoplasm of tongue, unspecified
TCGA-D6-6825	Wild-type	Yes	c02.9	Malignant neoplasm of tongue, unspecified
TCGA-D6-8569	Wild-type	Yes	c02.9	Malignant neoplasm of tongue, unspecified
TCGA-D6-A4Z9	Wild-type	Yes	c02.9	Malignant neoplasm of tongue, unspecified
TCGA-D6-A4ZB	Wild-type	Yes	c02.9	Malignant neoplasm of tongue, unspecified
TCGA-DQ-5624	Wild-type	Yes	c02.9	Malignant neoplasm of tongue, unspecified
TCGA-DQ-5625	Wild-type	Yes	c02.9	Malignant neoplasm of tongue, unspecified
TCGA-DQ-5630	Wild-type	Yes	c02.9	Malignant neoplasm of tongue, unspecified
TCGA-DQ-5631	Wild-type	Yes	c02.9	Malignant neoplasm of tongue, unspecified
TCGA-DQ-7592	Wild-type	Yes	c02.9	Malignant neoplasm of tongue, unspecified
TCGA-F7-A50G	Wild-type	Yes	c02.9	Malignant neoplasm of tongue, unspecified
TCGA-F7-A50J	Wild-type	Yes	c02.9	Malignant neoplasm of tongue, unspecified
TCGA-F7-A61S	Wild-type	Yes	c02.9	Malignant neoplasm of tongue, unspecified
TCGA-F7-A61W	Wild-type	Yes	c02.9	Malignant neoplasm of tongue, unspecified
TCGA-H7-A6C4	Wild-type	Yes	c02.9	Malignant neoplasm of tongue, unspecified
TCGA-HD-7831	Wild-type	Yes	c02.9	Malignant neoplasm of tongue, unspecified
TCGA-HD-8634	Wild-type	Yes	c02.9	Malignant neoplasm of tongue, unspecified
TCGA-HD-8635	Wild-type	Yes	c02.9	Malignant neoplasm of tongue, unspecified
TCGA-HD-A6HZ	Wild-type	Yes	c02.9	Malignant neoplasm of tongue, unspecified
TCGA-IQ-A61E	Wild-type	Yes	c02.9	Malignant neoplasm of tongue, unspecified
TCGA-IQ-A61H	Wild-type	Yes	c02.9	Malignant neoplasm of tongue, unspecified
TCGA-IQ-A61J	Wild-type	Yes	c02.9	Malignant neoplasm of tongue, unspecified
TCGA-IQ-A61K	Wild-type	Yes	c02.9	Malignant neoplasm of tongue, unspecified
TCGA-IQ-A6SG	Wild-type	Yes	c02.9	Malignant neoplasm of tongue, unspecified
TCGA-IQ-A6SH	Wild-type	Yes	c02.9	Malignant neoplasm of tongue, unspecified
TCGA-KU-A6H8	Wild-type	Yes	c02.9	Malignant neoplasm of tongue, unspecified
TCGA-MT-A51W	Wild-type	Yes	c02.9	Malignant neoplasm of tongue, unspecified
TCGA-MT-A51X	Wild-type	Yes	c02.9	Malignant neoplasm of tongue, unspecified
TCGA-MT-A67A	Wild-type	Yes	c02.9	Malignant neoplasm of tongue, unspecified
TCGA-P3-A5QA	Wild-type	Yes	c02.9	Malignant neoplasm of tongue, unspecified
TCGA-QK-A652	Wild-type	Yes	c02.9	Malignant neoplasm of tongue, unspecified
TCGA-QK-AA3K	Wild-type	Yes	c02.9	Malignant neoplasm of tongue, unspecified
TCGA-UF-A7JS	Wild-type	Yes	c02.9	Malignant neoplasm of tongue, unspecified
TCGA-WA-A7H4	Wild-type	Yes	c02.9	Malignant neoplasm of tongue, unspecified
TCGA-BA-A6DJ	Wild-type	Yes	c03.9	Malignant neoplasm of gum, unspecified
TCGA-CN-6011	Wild-type	Yes	c03.9	Malignant neoplasm of gum, unspecified
TCGA-CN-6013	Wild-type	Yes	c03.9	Malignant neoplasm of gum, unspecified
TCGA-QK-A6IH	Wild-type	Yes	c03.9	Malignant neoplasm of gum, unspecified
TCGA-UF-A71B	Wild-type	Yes	c03.9	Malignant neoplasm of gum, unspecified
TCGA-CQ-A4C9	Wild-type	Yes	c04.0	Malignant neoplasm of anterior floor of mouth
TCGA-BA-5149	Wild-type	Yes	c04.9	Malignant neoplasm of floor of mouth, unspecified
TCGA-BA-6872	Wild-type	Yes	c04.9	Malignant neoplasm of floor of mouth, unspecified
TCGA-BA-A6D8	Wild-type	Yes	c04.9	Malignant neoplasm of floor of mouth, unspecified
TCGA-BA-A6DD	Wild-type	Yes	c04.9	Malignant neoplasm of floor of mouth, unspecified
TCGA-BA-A6DF	Wild-type	Yes	c04.9	Malignant neoplasm of floor of mouth, unspecified
TCGA-BB-8601	Wild-type	Yes	c04.9	Malignant neoplasm of floor of mouth, unspecified
TCGA-CN-5358	Wild-type	Yes	c04.9	Malignant neoplasm of floor of mouth, unspecified
TCGA-CN-5359	Wild-type	Yes	c04.9	Malignant neoplasm of floor of mouth, unspecified
TCGA-CN-5364	Wild-type	Yes	c04.9	Malignant neoplasm of floor of mouth, unspecified
TCGA-CN-5373	Wild-type	Yes	c04.9	Malignant neoplasm of floor of mouth, unspecified
TCGA-CN-6020	Wild-type	Yes	c04.9	Malignant neoplasm of floor of mouth, unspecified
TCGA-CN-6995	Wild-type	Yes	c04.9	Malignant neoplasm of floor of mouth, unspecified
TCGA-CQ-A4C7	Wild-type	Yes	c04.9	Malignant neoplasm of floor of mouth, unspecified
TCGA-CQ-A4CB	Wild-type	Yes	c04.9	Malignant neoplasm of floor of mouth, unspecified
TCGA-CR-6491	Wild-type	Yes	c04.9	Malignant neoplasm of floor of mouth, unspecified
TCGA-CV-5436	Wild-type	Yes	c04.9	Malignant neoplasm of floor of mouth, unspecified
TCGA-CV-6936	Wild-type	Yes	c04.9	Malignant neoplasm of floor of mouth, unspecified
TCGA-CV-6948	Wild-type	Yes	c04.9	Malignant neoplasm of floor of mouth, unspecified
TCGA-CV-7102	Wild-type	Yes	c04.9	Malignant neoplasm of floor of mouth, unspecified
TCGA-CV-7235	Wild-type	Yes	c04.9	Malignant neoplasm of floor of mouth, unspecified
TCGA-CV-7407	Wild-type	Yes	c04.9	Malignant neoplasm of floor of mouth, unspecified
TCGA-CV-A45X	Wild-type	Yes	c04.9	Malignant neoplasm of floor of mouth, unspecified
TCGA-CX-7086	Wild-type	Yes	c04.9	Malignant neoplasm of floor of mouth, unspecified
TCGA-CX-7219	Wild-type	Yes	c04.9	Malignant neoplasm of floor of mouth, unspecified
TCGA-CX-A4AQ	Wild-type	Yes	c04.9	Malignant neoplasm of floor of mouth, unspecified
TCGA-D6-A6EO	Wild-type	Yes	c04.9	Malignant neoplasm of floor of mouth, unspecified
TCGA-F7-8489	Wild-type	Yes	c04.9	Malignant neoplasm of floor of mouth, unspecified
TCGA-HD-7917	Wild-type	Yes	c04.9	Malignant neoplasm of floor of mouth, unspecified
TCGA-IQ-A61G	Wild-type	Yes	c04.9	Malignant neoplasm of floor of mouth, unspecified
TCGA-KU-A66T	Wild-type	Yes	c04.9	Malignant neoplasm of floor of mouth, unspecified
TCGA-MT-A7BN	Wild-type	Yes	c04.9	Malignant neoplasm of floor of mouth, unspecified
TCGA-P3-A6T0	Wild-type	Yes	c04.9	Malignant neoplasm of floor of mouth, unspecified
TCGA-P3-A6T4	Wild-type	Yes	c04.9	Malignant neoplasm of floor of mouth, unspecified
TCGA-P3-A6T7	Wild-type	Yes	c04.9	Malignant neoplasm of floor of mouth, unspecified
TCGA-P3-A6T8	Wild-type	Yes	c04.9	Malignant neoplasm of floor of mouth, unspecified
TCGA-QK-A6II	Wild-type	Yes	c04.9	Malignant neoplasm of floor of mouth, unspecified
TCGA-QK-A6IJ	Wild-type	Yes	c04.9	Malignant neoplasm of floor of mouth, unspecified
TCGA-QK-A8Z7	Wild-type	Yes	c04.9	Malignant neoplasm of floor of mouth, unspecified
TCGA-QK-A8Z9	Wild-type	Yes	c04.9	Malignant neoplasm of floor of mouth, unspecified
TCGA-T3-A92N	Wild-type	Yes	c04.9	Malignant neoplasm of floor of mouth, unspecified
TCGA-UF-A719	Wild-type	Yes	c04.9	Malignant neoplasm of floor of mouth, unspecified
TCGA-UF-A71A	Wild-type	Yes	c04.9	Malignant neoplasm of floor of mouth, unspecified
TCGA-UF-A71E	Wild-type	Yes	c04.9	Malignant neoplasm of floor of mouth, unspecified
TCGA-UF-A7JC	Wild-type	Yes	c04.9	Malignant neoplasm of floor of mouth, unspecified
TCGA-UF-A7JT	Wild-type	Yes	c04.9	Malignant neoplasm of floor of mouth, unspecified
TCGA-WA-A7GZ	Wild-type	Yes	c04.9	Malignant neoplasm of floor of mouth, unspecified
TCGA-CR-6492	Wild-type	Yes	c05.0	Malignant neoplasm of hard palate
TCGA-CN-4726	Wild-type	Yes	c06.0	Malignant neoplasm of cheek mucosa
TCGA-CN-A63V	Wild-type	Yes	c06.0	Malignant neoplasm of cheek mucosa
TCGA-CQ-A4C6	Wild-type	Yes	c06.0	Malignant neoplasm of cheek mucosa
TCGA-CQ-A4CG	Wild-type	Yes	c06.0	Malignant neoplasm of cheek mucosa
TCGA-CQ-A4CI	Wild-type	Yes	c06.0	Malignant neoplasm of cheek mucosa
TCGA-CV-6940	Wild-type	Yes	c06.0	Malignant neoplasm of cheek mucosa
TCGA-CV-A464	Wild-type	Yes	c06.0	Malignant neoplasm of cheek mucosa
TCGA-IQ-7631	Wild-type	Yes	c06.0	Malignant neoplasm of cheek mucosa
TCGA-UF-A7JA	Wild-type	Yes	c06.0	Malignant neoplasm of cheek mucosa
TCGA-UF-A7JD	Wild-type	Yes	c06.0	Malignant neoplasm of cheek mucosa
TCGA-H7-8502	Wild-type	Yes	c06.2	Malignant neoplasm of retromolar area
TCGA-BB-7872	Wild-type	Yes	c06.9	Malignant neoplasm of mouth, unspecified
TCGA-BB-A5HU	Wild-type	Yes	c06.9	Malignant neoplasm of mouth, unspecified
TCGA-BB-A5HZ	Wild-type	Yes	c06.9	Malignant neoplasm of mouth, unspecified
TCGA-CN-4740	Wild-type	Yes	c06.9	Malignant neoplasm of mouth, unspecified
TCGA-CQ-7063	Wild-type	Yes	c06.9	Malignant neoplasm of mouth, unspecified
TCGA-CQ-7064	Wild-type	Yes	c06.9	Malignant neoplasm of mouth, unspecified
TCGA-CQ-7067	Wild-type	Yes	c06.9	Malignant neoplasm of mouth, unspecified
TCGA-CQ-7069	Wild-type	Yes	c06.9	Malignant neoplasm of mouth, unspecified
TCGA-CV-A45Q	Wild-type	Yes	c06.9	Malignant neoplasm of mouth, unspecified
TCGA-CV-A45U	Wild-type	Yes	c06.9	Malignant neoplasm of mouth, unspecified
TCGA-CV-A6JE	Wild-type	Yes	c06.9	Malignant neoplasm of mouth, unspecified
TCGA-CV-A6JN	Wild-type	Yes	c06.9	Malignant neoplasm of mouth, unspecified
TCGA-CV-A6JY	Wild-type	Yes	c06.9	Malignant neoplasm of mouth, unspecified
TCGA-CV-A6JZ	Wild-type	Yes	c06.9	Malignant neoplasm of mouth, unspecified
TCGA-D6-A6EM	Wild-type	Yes	c06.9	Malignant neoplasm of mouth, unspecified
TCGA-HD-A633	Wild-type	Yes	c06.9	Malignant neoplasm of mouth, unspecified
TCGA-HD-A6I0	Wild-type	Yes	c06.9	Malignant neoplasm of mouth, unspecified
TCGA-P3-A6T3	Wild-type	Yes	c06.9	Malignant neoplasm of mouth, unspecified
TCGA-BA-5152	Wild-type	Yes	c14.8	Malignant neoplasm of overlapping sites of lip
TCGA-BA-5557	Wild-type	Yes	c14.8	Malignant neoplasm of overlapping sites of lip
TCGA-CN-4728	Wild-type	Yes	c14.8	Malignant neoplasm of overlapping sites of lip
TCGA-CN-4729	Wild-type	Yes	c14.8	Malignant neoplasm of overlapping sites of lip
TCGA-CN-4730	Wild-type	Yes	c14.8	Malignant neoplasm of overlapping sites of lip
TCGA-CN-4731	Wild-type	Yes	c14.8	Malignant neoplasm of overlapping sites of lip
TCGA-CN-6018	Wild-type	Yes	c14.8	Malignant neoplasm of overlapping sites of lip
TCGA-CN-6994	Wild-type	Yes	c14.8	Malignant neoplasm of overlapping sites of lip
TCGA-CQ-5326	Wild-type	Yes	c14.8	Malignant neoplasm of overlapping sites of lip
TCGA-CQ-5332	Wild-type	Yes	c14.8	Malignant neoplasm of overlapping sites of lip
TCGA-CQ-6223	Wild-type	Yes	c14.8	Malignant neoplasm of overlapping sites of lip
TCGA-CQ-6225	Wild-type	Yes	c14.8	Malignant neoplasm of overlapping sites of lip
TCGA-CQ-6227	Wild-type	Yes	c14.8	Malignant neoplasm of overlapping sites of lip
TCGA-CQ-6228	Wild-type	Yes	c14.8	Malignant neoplasm of overlapping sites of lip
TCGA-CR-6484	Wild-type	Yes	c14.8	Malignant neoplasm of overlapping sites of lip
TCGA-CR-7365	Wild-type	Yes	c14.8	Malignant neoplasm of overlapping sites of lip
TCGA-CR-7367	Wild-type	Yes	c14.8	Malignant neoplasm of overlapping sites of lip
TCGA-CR-7373	Wild-type	Yes	c14.8	Malignant neoplasm of overlapping sites of lip
TCGA-CR-7376	Wild-type	Yes	c14.8	Malignant neoplasm of overlapping sites of lip
TCGA-CR-7377	Wild-type	Yes	c14.8	Malignant neoplasm of overlapping sites of lip
TCGA-CR-7380	Wild-type	Yes	c14.8	Malignant neoplasm of overlapping sites of lip
TCGA-CR-7386	Wild-type	Yes	c14.8	Malignant neoplasm of overlapping sites of lip
TCGA-CV-6937	Wild-type	Yes	c14.8	Malignant neoplasm of overlapping sites of lip
TCGA-CV-6942	Wild-type	Yes	c14.8	Malignant neoplasm of overlapping sites of lip
TCGA-CV-6955	Wild-type	Yes	c14.8	Malignant neoplasm of overlapping sites of lip
TCGA-CV-6960	Wild-type	Yes	c14.8	Malignant neoplasm of overlapping sites of lip
TCGA-CV-7090	Wild-type	Yes	c14.8	Malignant neoplasm of overlapping sites of lip
TCGA-CV-7091	Wild-type	Yes	c14.8	Malignant neoplasm of overlapping sites of lip
TCGA-CV-7097	Wild-type	Yes	c14.8	Malignant neoplasm of overlapping sites of lip
TCGA-CV-7178	Wild-type	Yes	c14.8	Malignant neoplasm of overlapping sites of lip
TCGA-CV-7183	Wild-type	Yes	c14.8	Malignant neoplasm of overlapping sites of lip
TCGA-CV-7253	Wild-type	Yes	c14.8	Malignant neoplasm of overlapping sites of lip
TCGA-CV-7254	Wild-type	Yes	c14.8	Malignant neoplasm of overlapping sites of lip
TCGA-CV-7263	Wild-type	Yes	c14.8	Malignant neoplasm of overlapping sites of lip
TCGA-CV-7409	Wild-type	Yes	c14.8	Malignant neoplasm of overlapping sites of lip
TCGA-CV-7411	Wild-type	Yes	c14.8	Malignant neoplasm of overlapping sites of lip
TCGA-CV-7414	Wild-type	Yes	c14.8	Malignant neoplasm of overlapping sites of lip
TCGA-CV-7416	Wild-type	Yes	c14.8	Malignant neoplasm of overlapping sites of lip
TCGA-CV-7423	Wild-type	Yes	c14.8	Malignant neoplasm of overlapping sites of lip
TCGA-CV-7427	Wild-type	Yes	c14.8	Malignant neoplasm of overlapping sites of lip
TCGA-CV-7428	Wild-type	Yes	c14.8	Malignant neoplasm of overlapping sites of lip
TCGA-CV-7429	Wild-type	Yes	c14.8	Malignant neoplasm of overlapping sites of lip
TCGA-CV-7432	Wild-type	Yes	c14.8	Malignant neoplasm of overlapping sites of lip
TCGA-CV-7434	Wild-type	Yes	c14.8	Malignant neoplasm of overlapping sites of lip
TCGA-CV-7435	Wild-type	Yes	c14.8	Malignant neoplasm of overlapping sites of lip
TCGA-CV-7568	Wild-type	Yes	c14.8	Malignant neoplasm of overlapping sites of lip
TCGA-CX-7082	Wild-type	Yes	c14.8	Malignant neoplasm of overlapping sites of lip
TCGA-DQ-7588	Wild-type	Yes	c14.8	Malignant neoplasm of overlapping sites of lip
TCGA-H7-7774	Wild-type	Yes	c14.8	Malignant neoplasm of overlapping sites of lip
TCGA-IQ-7632	Wild-type	Yes	c14.8	Malignant neoplasm of overlapping sites of lip
TCGA-BA-4076	Wild-type	Yes	c32.9	Malignant neoplasm of larynx, unspecified
TCGA-BA-4078	Wild-type	Yes	c32.9	Malignant neoplasm of larynx, unspecified
TCGA-BA-5555	Wild-type	Yes	c32.9	Malignant neoplasm of larynx, unspecified
TCGA-BA-6868	Wild-type	Yes	c32.9	Malignant neoplasm of larynx, unspecified
TCGA-BA-6869	Wild-type	Yes	c32.9	Malignant neoplasm of larynx, unspecified
TCGA-BA-6870	Wild-type	Yes	c32.9	Malignant neoplasm of larynx, unspecified
TCGA-BA-A6DI	Wild-type	Yes	c32.9	Malignant neoplasm of larynx, unspecified
TCGA-BB-4217	Wild-type	Yes	c32.9	Malignant neoplasm of larynx, unspecified
TCGA-BB-7870	Wild-type	Yes	c32.9	Malignant neoplasm of larynx, unspecified
TCGA-CN-4722	Wild-type	Yes	c32.9	Malignant neoplasm of larynx, unspecified
TCGA-CN-4723	Wild-type	Yes	c32.9	Malignant neoplasm of larynx, unspecified
TCGA-CN-4727	Wild-type	Yes	c32.9	Malignant neoplasm of larynx, unspecified
TCGA-CN-4735	Wild-type	Yes	c32.9	Malignant neoplasm of larynx, unspecified
TCGA-CN-4738	Wild-type	Yes	c32.9	Malignant neoplasm of larynx, unspecified
TCGA-CN-4739	Wild-type	Yes	c32.9	Malignant neoplasm of larynx, unspecified
TCGA-CN-5355	Wild-type	Yes	c32.9	Malignant neoplasm of larynx, unspecified
TCGA-CN-5356	Wild-type	Yes	c32.9	Malignant neoplasm of larynx, unspecified
TCGA-CN-5360	Wild-type	Yes	c32.9	Malignant neoplasm of larynx, unspecified
TCGA-CN-5361	Wild-type	Yes	c32.9	Malignant neoplasm of larynx, unspecified
TCGA-CN-5363	Wild-type	Yes	c32.9	Malignant neoplasm of larynx, unspecified
TCGA-CN-5366	Wild-type	Yes	c32.9	Malignant neoplasm of larynx, unspecified
TCGA-CN-6010	Wild-type	Yes	c32.9	Malignant neoplasm of larynx, unspecified
TCGA-CN-6012	Wild-type	Yes	c32.9	Malignant neoplasm of larynx, unspecified
TCGA-CN-6021	Wild-type	Yes	c32.9	Malignant neoplasm of larynx, unspecified
TCGA-CN-6022	Wild-type	Yes	c32.9	Malignant neoplasm of larynx, unspecified
TCGA-CN-6023	Wild-type	Yes	c32.9	Malignant neoplasm of larynx, unspecified
TCGA-CN-6988	Wild-type	Yes	c32.9	Malignant neoplasm of larynx, unspecified
TCGA-CN-6989	Wild-type	Yes	c32.9	Malignant neoplasm of larynx, unspecified
TCGA-CN-6992	Wild-type	Yes	c32.9	Malignant neoplasm of larynx, unspecified
TCGA-CN-6997	Wild-type	Yes	c32.9	Malignant neoplasm of larynx, unspecified
TCGA-CN-A497	Wild-type	Yes	c32.9	Malignant neoplasm of larynx, unspecified
TCGA-CN-A49B	Wild-type	Yes	c32.9	Malignant neoplasm of larynx, unspecified
TCGA-CN-A63T	Wild-type	Yes	c32.9	Malignant neoplasm of larynx, unspecified
TCGA-CN-A63U	Wild-type	Yes	c32.9	Malignant neoplasm of larynx, unspecified
TCGA-CN-A63W	Wild-type	Yes	c32.9	Malignant neoplasm of larynx, unspecified
TCGA-CN-A641	Wild-type	Yes	c32.9	Malignant neoplasm of larynx, unspecified
TCGA-CN-A6V3	Wild-type	Yes	c32.9	Malignant neoplasm of larynx, unspecified
TCGA-CR-6474	Wild-type	Yes	c32.9	Malignant neoplasm of larynx, unspecified
TCGA-CR-7364	Wild-type	Yes	c32.9	Malignant neoplasm of larynx, unspecified
TCGA-CR-7370	Wild-type	Yes	c32.9	Malignant neoplasm of larynx, unspecified
TCGA-CR-7371	Wild-type	Yes	c32.9	Malignant neoplasm of larynx, unspecified
TCGA-CR-7374	Wild-type	Yes	c32.9	Malignant neoplasm of larynx, unspecified
TCGA-CR-7388	Wild-type	Yes	c32.9	Malignant neoplasm of larynx, unspecified
TCGA-CR-7389	Wild-type	Yes	c32.9	Malignant neoplasm of larynx, unspecified
TCGA-CR-7398	Wild-type	Yes	c32.9	Malignant neoplasm of larynx, unspecified
TCGA-CR-7399	Wild-type	Yes	c32.9	Malignant neoplasm of larynx, unspecified
TCGA-CV-5430	Wild-type	Yes	c32.9	Malignant neoplasm of larynx, unspecified
TCGA-CV-5431	Wild-type	Yes	c32.9	Malignant neoplasm of larynx, unspecified
TCGA-CV-5432	Wild-type	Yes	c32.9	Malignant neoplasm of larynx, unspecified
TCGA-CV-5434	Wild-type	Yes	c32.9	Malignant neoplasm of larynx, unspecified
TCGA-CV-5435	Wild-type	Yes	c32.9	Malignant neoplasm of larynx, unspecified
TCGA-CV-5440	Wild-type	Yes	c32.9	Malignant neoplasm of larynx, unspecified
TCGA-CV-5441	Wild-type	Yes	c32.9	Malignant neoplasm of larynx, unspecified
TCGA-CV-5444	Wild-type	Yes	c32.9	Malignant neoplasm of larynx, unspecified
TCGA-CV-5978	Wild-type	Yes	c32.9	Malignant neoplasm of larynx, unspecified
TCGA-CV-6935	Wild-type	Yes	c32.9	Malignant neoplasm of larynx, unspecified
TCGA-CV-6962	Wild-type	Yes	c32.9	Malignant neoplasm of larynx, unspecified
TCGA-CV-7089	Wild-type	Yes	c32.9	Malignant neoplasm of larynx, unspecified
TCGA-CV-7101	Wild-type	Yes	c32.9	Malignant neoplasm of larynx, unspecified
TCGA-CV-7177	Wild-type	Yes	c32.9	Malignant neoplasm of larynx, unspecified
TCGA-CV-7242	Wild-type	Yes	c32.9	Malignant neoplasm of larynx, unspecified
TCGA-CV-7245	Wild-type	Yes	c32.9	Malignant neoplasm of larynx, unspecified
TCGA-CV-7247	Wild-type	Yes	c32.9	Malignant neoplasm of larynx, unspecified
TCGA-CV-7248	Wild-type	Yes	c32.9	Malignant neoplasm of larynx, unspecified
TCGA-CV-7250	Wild-type	Yes	c32.9	Malignant neoplasm of larynx, unspecified
TCGA-CV-7261	Wild-type	Yes	c32.9	Malignant neoplasm of larynx, unspecified
TCGA-CV-7410	Wild-type	Yes	c32.9	Malignant neoplasm of larynx, unspecified
TCGA-CV-7415	Wild-type	Yes	c32.9	Malignant neoplasm of larynx, unspecified
TCGA-CV-7418	Wild-type	Yes	c32.9	Malignant neoplasm of larynx, unspecified
TCGA-CV-7421	Wild-type	Yes	c32.9	Malignant neoplasm of larynx, unspecified
TCGA-CV-7422	Wild-type	Yes	c32.9	Malignant neoplasm of larynx, unspecified
TCGA-CV-7424	Wild-type	Yes	c32.9	Malignant neoplasm of larynx, unspecified
TCGA-CV-7430	Wild-type	Yes	c32.9	Malignant neoplasm of larynx, unspecified
TCGA-CV-7433	Wild-type	Yes	c32.9	Malignant neoplasm of larynx, unspecified
TCGA-CV-7437	Wild-type	Yes	c32.9	Malignant neoplasm of larynx, unspecified
TCGA-CV-7440	Wild-type	Yes	c32.9	Malignant neoplasm of larynx, unspecified
TCGA-CV-A45W	Wild-type	Yes	c32.9	Malignant neoplasm of larynx, unspecified
TCGA-CV-A45Y	Wild-type	Yes	c32.9	Malignant neoplasm of larynx, unspecified
TCGA-CV-A45Z	Wild-type	Yes	c32.9	Malignant neoplasm of larynx, unspecified
TCGA-CV-A460	Wild-type	Yes	c32.9	Malignant neoplasm of larynx, unspecified
TCGA-CV-A461	Wild-type	Yes	c32.9	Malignant neoplasm of larynx, unspecified
TCGA-CV-A6K1	Wild-type	Yes	c32.9	Malignant neoplasm of larynx, unspecified
TCGA-D6-6517	Wild-type	Yes	c32.9	Malignant neoplasm of larynx, unspecified
TCGA-D6-6824	Wild-type	Yes	c32.9	Malignant neoplasm of larynx, unspecified
TCGA-D6-6826	Wild-type	Yes	c32.9	Malignant neoplasm of larynx, unspecified
TCGA-D6-8568	Wild-type	Yes	c32.9	Malignant neoplasm of larynx, unspecified
TCGA-D6-A6EQ	Wild-type	Yes	c32.9	Malignant neoplasm of larynx, unspecified
TCGA-D6-A6ES	Wild-type	Yes	c32.9	Malignant neoplasm of larynx, unspecified
TCGA-D6-A74Q	Wild-type	Yes	c32.9	Malignant neoplasm of larynx, unspecified
TCGA-DQ-5629	Wild-type	Yes	c32.9	Malignant neoplasm of larynx, unspecified
TCGA-DQ-7589	Wild-type	Yes	c32.9	Malignant neoplasm of larynx, unspecified
TCGA-DQ-7595	Wild-type	Yes	c32.9	Malignant neoplasm of larynx, unspecified
TCGA-F7-7848	Wild-type	Yes	c32.9	Malignant neoplasm of larynx, unspecified
TCGA-F7-8298	Wild-type	Yes	c32.9	Malignant neoplasm of larynx, unspecified
TCGA-F7-A50I	Wild-type	Yes	c32.9	Malignant neoplasm of larynx, unspecified
TCGA-F7-A622	Wild-type	Yes	c32.9	Malignant neoplasm of larynx, unspecified
TCGA-F7-A623	Wild-type	Yes	c32.9	Malignant neoplasm of larynx, unspecified
TCGA-H7-A6C5	Wild-type	No	c32.9	Malignant neoplasm of larynx, unspecified
TCGA-HD-7229	Wild-type	No	c32.9	Malignant neoplasm of larynx, unspecified
TCGA-KU-A66S	Wild-type	No	c32.9	Malignant neoplasm of larynx, unspecified
TCGA-QK-A8Z8	Wild-type	No	c32.9	Malignant neoplasm of larynx, unspecified
TCGA-QK-A8ZB	Wild-type	No	c32.9	Malignant neoplasm of larynx, unspecified
TCGA-QK-AA3J	Wild-type	No	c32.9	Malignant neoplasm of larynx, unspecified
TCGA-T3-A92M	Wild-type	No	c32.9	Malignant neoplasm of larynx, unspecified
TCGA-TN-A7HJ	Wild-type	No	c32.9	Malignant neoplasm of larynx, unspecified
TCGA-UF-A718	Wild-type	No	c32.9	Malignant neoplasm of larynx, unspecified
TCGA-UF-A71D	Wild-type	No	c32.9	Malignant neoplasm of larynx, unspecified
TCGA-UF-A7J9	Wild-type	No	c32.9	Malignant neoplasm of larynx, unspecified
TCGA-UF-A7JF	Wild-type	No	c32.9	Malignant neoplasm of larynx, unspecified
TCGA-UF-A7JH	Wild-type	No	c32.9	Malignant neoplasm of larynx, unspecified
TCGA-UF-A7JJ	Wild-type	No	c32.9	Malignant neoplasm of larynx, unspecified
TCGA-UF-A7JK	Wild-type	No	c32.9	Malignant neoplasm of larynx, unspecified

## Sheet: UCECs used in this study, n=532
List of UCEC tumours used in this study. The table lists UCEC cases from TCGA analyzed in the study, along with the status of CASP8 mutation, availability of gene expression data, ICD-10-CM code and site of tumor.
Case Barcode	CASP8 Status	Gene Expression File	ICD-10-CM Code	Site
TCGA-A5-A0G1	Mutant	Yes	c54.1	Malignant neoplasm of endometrium
TCGA-A5-A0G2	Mutant	Yes	c54.1	Malignant neoplasm of endometrium
TCGA-A5-A0GP	Mutant	Yes	c54.1	Malignant neoplasm of endometrium
TCGA-A5-A1OF	Mutant	Yes	c54.1	Malignant neoplasm of endometrium
TCGA-AJ-A2QM	Mutant	Yes	c54.1	Malignant neoplasm of endometrium
TCGA-AJ-A3BH	Mutant	Yes	c54.1	Malignant neoplasm of endometrium
TCGA-AJ-A3EL	Mutant	Yes	c54.1	Malignant neoplasm of endometrium
TCGA-AJ-A5DW	Mutant	Yes	c54.1	Malignant neoplasm of endometrium
TCGA-AP-A056	Mutant	Yes	c54.1	Malignant neoplasm of endometrium
TCGA-AP-A059	Mutant	Yes	c54.1	Malignant neoplasm of endometrium
TCGA-AP-A05P	Mutant	Yes	c54.1	Malignant neoplasm of endometrium
TCGA-AP-A0LG	Mutant	Yes	c54.1	Malignant neoplasm of endometrium
TCGA-AP-A1DV	Mutant	Yes	c54.1	Malignant neoplasm of endometrium
TCGA-AP-A1E0	Mutant	Yes	c54.1	Malignant neoplasm of endometrium
TCGA-AX-A05S	Mutant	Yes	c54.1	Malignant neoplasm of endometrium
TCGA-AX-A05Z	Mutant	Yes	c54.1	Malignant neoplasm of endometrium
TCGA-AX-A06F	Mutant	Yes	c54.1	Malignant neoplasm of endometrium
TCGA-AX-A0J0	Mutant	Yes	c54.1	Malignant neoplasm of endometrium
TCGA-AX-A1CE	Mutant	Yes	c54.1	Malignant neoplasm of endometrium
TCGA-AX-A2HC	Mutant	Yes	c54.1	Malignant neoplasm of endometrium
TCGA-AX-A2HD	Mutant	Yes	c54.1	Malignant neoplasm of endometrium
TCGA-B5-A11E	Mutant	Yes	c54.1	Malignant neoplasm of endometrium
TCGA-B5-A11G	Mutant	Yes	c54.1	Malignant neoplasm of endometrium
TCGA-B5-A11N	Mutant	Yes	c54.1	Malignant neoplasm of endometrium
TCGA-B5-A1MR	Mutant	Yes	c54.1	Malignant neoplasm of endometrium
TCGA-B5-A1MX	Mutant	Yes	c54.1	Malignant neoplasm of endometrium
TCGA-B5-A3F9	Mutant	Yes	c54.1	Malignant neoplasm of endometrium
TCGA-B5-A3FA	Mutant	Yes	c54.1	Malignant neoplasm of endometrium
TCGA-BG-A220	Mutant	Yes	c54.1	Malignant neoplasm of endometrium
TCGA-BG-A221	Mutant	Yes	c54.1	Malignant neoplasm of endometrium
TCGA-BG-A222	Mutant	Yes	c54.1	Malignant neoplasm of endometrium
TCGA-BK-A6W3	Mutant	Yes	c54.1	Malignant neoplasm of endometrium
TCGA-BS-A0TA	Mutant	Yes	c54.1	Malignant neoplasm of endometrium
TCGA-BS-A0TJ	Mutant	Yes	c54.1	Malignant neoplasm of endometrium
TCGA-BS-A0UF	Mutant	Yes	c54.1	Malignant neoplasm of endometrium
TCGA-BS-A0UJ	Mutant	Yes	c54.1	Malignant neoplasm of endometrium
TCGA-BS-A0UV	Mutant	Yes	c54.1	Malignant neoplasm of endometrium
TCGA-D1-A0ZR	Mutant	Yes	c54.1	Malignant neoplasm of endometrium
TCGA-D1-A161	Mutant	Yes	c54.1	Malignant neoplasm of endometrium
TCGA-D1-A167	Mutant	Yes	c54.1	Malignant neoplasm of endometrium
TCGA-D1-A16X	Mutant	Yes	c54.1	Malignant neoplasm of endometrium
TCGA-D1-A17Q	Mutant	Yes	c54.1	Malignant neoplasm of endometrium
TCGA-E6-A1LX	Mutant	Yes	c54.1	Malignant neoplasm of endometrium
TCGA-EO-A22R	Mutant	Yes	c54.1	Malignant neoplasm of endometrium
TCGA-EO-A22U	Mutant	Yes	c54.1	Malignant neoplasm of endometrium
TCGA-EO-A22X	Mutant	Yes	c54.1	Malignant neoplasm of endometrium
TCGA-EO-A3AY	Mutant	Yes	c54.1	Malignant neoplasm of endometrium
TCGA-EO-A3AZ	Mutant	Yes	c54.1	Malignant neoplasm of endometrium
TCGA-EO-A3B0	Mutant	Yes	c54.1	Malignant neoplasm of endometrium
TCGA-EY-A1GI	Mutant	Yes	c54.1	Malignant neoplasm of endometrium
TCGA-EY-A548	Mutant	Yes	c54.1	Malignant neoplasm of endometrium
TCGA-FI-A2D0	Mutant	Yes	c54.1	Malignant neoplasm of endometrium
TCGA-FI-A2D5	Mutant	Yes	c54.1	Malignant neoplasm of endometrium
TCGA-FI-A2EW	Mutant	Yes	c54.1	Malignant neoplasm of endometrium
TCGA-PG-A917	Mutant	Yes	c54.1	Malignant neoplasm of endometrium
TCGA-QF-A5YS	Mutant	Yes	c54.1	Malignant neoplasm of endometrium
TCGA-2E-A9G8	Wild-type	Yes	c54.3	Malignant neoplasm of fundus uteri
TCGA-4E-A92E	Wild-type	Yes	c54.1	Malignant neoplasm of endometrium
TCGA-5B-A90C	Wild-type	Yes	c54.1	Malignant neoplasm of endometrium
TCGA-5S-A9Q8	Wild-type	Yes	c54.1	Malignant neoplasm of endometrium
TCGA-A5-A0G3	Wild-type	Yes	c54.1	Malignant neoplasm of endometrium
TCGA-A5-A0G5	Wild-type	Yes	c54.1	Malignant neoplasm of endometrium
TCGA-A5-A0G9	Wild-type	Yes	c54.1	Malignant neoplasm of endometrium
TCGA-A5-A0GA	Wild-type	Yes	c54.1	Malignant neoplasm of endometrium
TCGA-A5-A0GB	Wild-type	Yes	c54.1	Malignant neoplasm of endometrium
TCGA-A5-A0GD	Wild-type	Yes	c54.1	Malignant neoplasm of endometrium
TCGA-A5-A0GE	Wild-type	Yes	c54.1	Malignant neoplasm of endometrium
TCGA-A5-A0GG	Wild-type	Yes	c54.1	Malignant neoplasm of endometrium
TCGA-A5-A0GH	Wild-type	Yes	c54.1	Malignant neoplasm of endometrium
TCGA-A5-A0GI	Wild-type	Yes	c54.1	Malignant neoplasm of endometrium
TCGA-A5-A0GJ	Wild-type	Yes	c54.1	Malignant neoplasm of endometrium
TCGA-A5-A0GM	Wild-type	Yes	c54.1	Malignant neoplasm of endometrium
TCGA-A5-A0GN	Wild-type	Yes	c54.1	Malignant neoplasm of endometrium
TCGA-A5-A0GQ	Wild-type	Yes	c54.1	Malignant neoplasm of endometrium
TCGA-A5-A0GR	Wild-type	Yes	c54.1	Malignant neoplasm of endometrium
TCGA-A5-A0GU	Wild-type	Yes	c54.1	Malignant neoplasm of endometrium
TCGA-A5-A0GV	Wild-type	Yes	c54.1	Malignant neoplasm of endometrium
TCGA-A5-A0GW	Wild-type	Yes	c54.1	Malignant neoplasm of endometrium
TCGA-A5-A0GX	Wild-type	Yes	c54.1	Malignant neoplasm of endometrium
TCGA-A5-A0R6	Wild-type	Yes	c54.1	Malignant neoplasm of endometrium
TCGA-A5-A0R7	Wild-type	Yes	c54.1	Malignant neoplasm of endometrium
TCGA-A5-A0R8	Wild-type	Yes	c54.1	Malignant neoplasm of endometrium
TCGA-A5-A0R9	Wild-type	Yes	c54.1	Malignant neoplasm of endometrium
TCGA-A5-A0RA	Wild-type	Yes	c54.1	Malignant neoplasm of endometrium
TCGA-A5-A0VO	Wild-type	Yes	c54.1	Malignant neoplasm of endometrium
TCGA-A5-A0VP	Wild-type	Yes	c54.1	Malignant neoplasm of endometrium
TCGA-A5-A0VQ	Wild-type	Yes	c54.1	Malignant neoplasm of endometrium
TCGA-A5-A1OG	Wild-type	Yes	c54.1	Malignant neoplasm of endometrium
TCGA-A5-A1OH	Wild-type	Yes	c54.1	Malignant neoplasm of endometrium
TCGA-A5-A1OJ	Wild-type	Yes	c54.1	Malignant neoplasm of endometrium
TCGA-A5-A1OK	Wild-type	Yes	c54.1	Malignant neoplasm of endometrium
TCGA-A5-A2K2	Wild-type	Yes	c54.1	Malignant neoplasm of endometrium
TCGA-A5-A2K3	Wild-type	Yes	c54.1	Malignant neoplasm of endometrium
TCGA-A5-A2K4	Wild-type	Yes	c54.1	Malignant neoplasm of endometrium
TCGA-A5-A2K7	Wild-type	Yes	c54.1	Malignant neoplasm of endometrium
TCGA-A5-A3LO	Wild-type	Yes	c54.1	Malignant neoplasm of endometrium
TCGA-A5-A3LP	Wild-type	Yes	c54.1	Malignant neoplasm of endometrium
TCGA-A5-A7WJ	Wild-type	Yes	c54.1	Malignant neoplasm of endometrium
TCGA-A5-A7WK	Wild-type	Yes	c54.1	Malignant neoplasm of endometrium
TCGA-A5-AB3J	Wild-type	Yes	c54.1	Malignant neoplasm of endometrium
TCGA-AJ-A23M	Wild-type	Yes	c54.1	Malignant neoplasm of endometrium
TCGA-AJ-A23N	Wild-type	Yes	c54.1	Malignant neoplasm of endometrium
TCGA-AJ-A23O	Wild-type	Yes	c54.1	Malignant neoplasm of endometrium
TCGA-AJ-A2QK	Wild-type	Yes	c54.1	Malignant neoplasm of endometrium
TCGA-AJ-A2QL	Wild-type	Yes	c54.1	Malignant neoplasm of endometrium
TCGA-AJ-A2QN	Wild-type	Yes	c54.1	Malignant neoplasm of endometrium
TCGA-AJ-A2QO	Wild-type	Yes	c54.1	Malignant neoplasm of endometrium
TCGA-AJ-A3BD	Wild-type	Yes	c54.1	Malignant neoplasm of endometrium
TCGA-AJ-A3BF	Wild-type	Yes	c54.1	Malignant neoplasm of endometrium
TCGA-AJ-A3BG	Wild-type	Yes	c54.1	Malignant neoplasm of endometrium
TCGA-AJ-A3BI	Wild-type	Yes	c54.1	Malignant neoplasm of endometrium
TCGA-AJ-A3BK	Wild-type	Yes	c54.1	Malignant neoplasm of endometrium
TCGA-AJ-A3EJ	Wild-type	Yes	c54.1	Malignant neoplasm of endometrium
TCGA-AJ-A3EK	Wild-type	Yes	c54.1	Malignant neoplasm of endometrium
TCGA-AJ-A3EM	Wild-type	Yes	c54.1	Malignant neoplasm of endometrium
TCGA-AJ-A3I9	Wild-type	Yes	c54.1	Malignant neoplasm of endometrium
TCGA-AJ-A3IA	Wild-type	Yes	c54.1	Malignant neoplasm of endometrium
TCGA-AJ-A3NC	Wild-type	Yes	c54.1	Malignant neoplasm of endometrium
TCGA-AJ-A3NE	Wild-type	Yes	c54.1	Malignant neoplasm of endometrium
TCGA-AJ-A3NF	Wild-type	Yes	c54.1	Malignant neoplasm of endometrium
TCGA-AJ-A3NG	Wild-type	Yes	c54.1	Malignant neoplasm of endometrium
TCGA-AJ-A3NH	Wild-type	Yes	c54.1	Malignant neoplasm of endometrium
TCGA-AJ-A3OJ	Wild-type	Yes	c54.1	Malignant neoplasm of endometrium
TCGA-AJ-A3OK	Wild-type	Yes	c54.1	Malignant neoplasm of endometrium
TCGA-AJ-A3OL	Wild-type	Yes	c54.1	Malignant neoplasm of endometrium
TCGA-AJ-A3QS	Wild-type	Yes	c54.1	Malignant neoplasm of endometrium
TCGA-AJ-A3TW	Wild-type	Yes	c54.1	Malignant neoplasm of endometrium
TCGA-AJ-A5DV	Wild-type	Yes	c54.1	Malignant neoplasm of endometrium
TCGA-AJ-A8CT	Wild-type	Yes	c54.1	Malignant neoplasm of endometrium
TCGA-AJ-A8CV	Wild-type	Yes	c54.1	Malignant neoplasm of endometrium
TCGA-AJ-A8CW	Wild-type	Yes	c54.1	Malignant neoplasm of endometrium
TCGA-AP-A051	Wild-type	Yes	c54.1	Malignant neoplasm of endometrium
TCGA-AP-A052	Wild-type	Yes	c54.1	Malignant neoplasm of endometrium
TCGA-AP-A053	Wild-type	Yes	c54.1	Malignant neoplasm of endometrium
TCGA-AP-A05A	Wild-type	Yes	c54.1	Malignant neoplasm of endometrium
TCGA-AP-A05D	Wild-type	Yes	c54.1	Malignant neoplasm of endometrium
TCGA-AP-A05H	Wild-type	Yes	c54.1	Malignant neoplasm of endometrium
TCGA-AP-A05J	Wild-type	Yes	c54.1	Malignant neoplasm of endometrium
TCGA-AP-A05N	Wild-type	Yes	c54.1	Malignant neoplasm of endometrium
TCGA-AP-A05O	Wild-type	Yes	c54.1	Malignant neoplasm of endometrium
TCGA-AP-A0L8	Wild-type	Yes	c54.1	Malignant neoplasm of endometrium
TCGA-AP-A0L9	Wild-type	Yes	c54.1	Malignant neoplasm of endometrium
TCGA-AP-A0LD	Wild-type	Yes	c54.1	Malignant neoplasm of endometrium
TCGA-AP-A0LE	Wild-type	Yes	c54.1	Malignant neoplasm of endometrium
TCGA-AP-A0LF	Wild-type	Yes	c54.1	Malignant neoplasm of endometrium
TCGA-AP-A0LH	Wild-type	Yes	c54.1	Malignant neoplasm of endometrium
TCGA-AP-A0LI	Wild-type	Yes	c54.1	Malignant neoplasm of endometrium
TCGA-AP-A0LJ	Wild-type	Yes	c54.1	Malignant neoplasm of endometrium
TCGA-AP-A0LL	Wild-type	Yes	c54.1	Malignant neoplasm of endometrium
TCGA-AP-A0LM	Wild-type	Yes	c54.1	Malignant neoplasm of endometrium
TCGA-AP-A0LN	Wild-type	Yes	c54.1	Malignant neoplasm of endometrium
TCGA-AP-A0LO	Wild-type	Yes	c54.1	Malignant neoplasm of endometrium
TCGA-AP-A0LP	Wild-type	Yes	c54.1	Malignant neoplasm of endometrium
TCGA-AP-A0LS	Wild-type	Yes	c54.1	Malignant neoplasm of endometrium
TCGA-AP-A0LT	Wild-type	Yes	c54.1	Malignant neoplasm of endometrium
TCGA-AP-A0LV	Wild-type	Yes	c54.1	Malignant neoplasm of endometrium
TCGA-AP-A1DH	Wild-type	Yes	c54.1	Malignant neoplasm of endometrium
TCGA-AP-A1DK	Wild-type	Yes	c54.1	Malignant neoplasm of endometrium
TCGA-AP-A1DM	Wild-type	Yes	c54.1	Malignant neoplasm of endometrium
TCGA-AP-A1DO	Wild-type	Yes	c54.1	Malignant neoplasm of endometrium
TCGA-AP-A1DP	Wild-type	Yes	c54.1	Malignant neoplasm of endometrium
TCGA-AP-A1DQ	Wild-type	Yes	c54.1	Malignant neoplasm of endometrium
TCGA-AP-A1DR	Wild-type	Yes	c54.1	Malignant neoplasm of endometrium
TCGA-AP-A1E1	Wild-type	Yes	c54.1	Malignant neoplasm of endometrium
TCGA-AP-A1E3	Wild-type	Yes	c54.1	Malignant neoplasm of endometrium
TCGA-AP-A1E4	Wild-type	Yes	c54.1	Malignant neoplasm of endometrium
TCGA-AP-A3K1	Wild-type	Yes	c54.1	Malignant neoplasm of endometrium
TCGA-AP-A5FX	Wild-type	Yes	c54.1	Malignant neoplasm of endometrium
TCGA-AW-A1PO	Wild-type	Yes	c54.1	Malignant neoplasm of endometrium
TCGA-AX-A05T	Wild-type	Yes	c54.1	Malignant neoplasm of endometrium
TCGA-AX-A05U	Wild-type	Yes	c54.1	Malignant neoplasm of endometrium
TCGA-AX-A05W	Wild-type	Yes	c54.1	Malignant neoplasm of endometrium
TCGA-AX-A05Y	Wild-type	Yes	c54.1	Malignant neoplasm of endometrium
TCGA-AX-A060	Wild-type	Yes	c54.1	Malignant neoplasm of endometrium
TCGA-AX-A062	Wild-type	Yes	c54.1	Malignant neoplasm of endometrium
TCGA-AX-A063	Wild-type	Yes	c54.1	Malignant neoplasm of endometrium
TCGA-AX-A064	Wild-type	Yes	c54.1	Malignant neoplasm of endometrium
TCGA-AX-A06B	Wild-type	Yes	c54.1	Malignant neoplasm of endometrium
TCGA-AX-A06D	Wild-type	Yes	c54.1	Malignant neoplasm of endometrium
TCGA-AX-A06H	Wild-type	Yes	c54.1	Malignant neoplasm of endometrium
TCGA-AX-A06J	Wild-type	Yes	c54.1	Malignant neoplasm of endometrium
TCGA-AX-A06L	Wild-type	Yes	c54.1	Malignant neoplasm of endometrium
TCGA-AX-A0IS	Wild-type	Yes	c54.1	Malignant neoplasm of endometrium
TCGA-AX-A0IU	Wild-type	Yes	c54.1	Malignant neoplasm of endometrium
TCGA-AX-A0IW	Wild-type	Yes	c54.1	Malignant neoplasm of endometrium
TCGA-AX-A0IZ	Wild-type	Yes	c54.1	Malignant neoplasm of endometrium
TCGA-AX-A0J1	Wild-type	Yes	c54.1	Malignant neoplasm of endometrium
TCGA-AX-A1C4	Wild-type	Yes	c54.1	Malignant neoplasm of endometrium
TCGA-AX-A1C5	Wild-type	Yes	c54.1	Malignant neoplasm of endometrium
TCGA-AX-A1C7	Wild-type	Yes	c54.1	Malignant neoplasm of endometrium
TCGA-AX-A1C8	Wild-type	Yes	c54.1	Malignant neoplasm of endometrium
TCGA-AX-A1C9	Wild-type	Yes	c54.1	Malignant neoplasm of endometrium
TCGA-AX-A1CA	Wild-type	Yes	c54.1	Malignant neoplasm of endometrium
TCGA-AX-A1CC	Wild-type	Yes	c54.1	Malignant neoplasm of endometrium
TCGA-AX-A1CF	Wild-type	Yes	c54.1	Malignant neoplasm of endometrium
TCGA-AX-A1CI	Wild-type	Yes	c54.1	Malignant neoplasm of endometrium
TCGA-AX-A1CJ	Wild-type	Yes	c54.1	Malignant neoplasm of endometrium
TCGA-AX-A1CK	Wild-type	Yes	c54.1	Malignant neoplasm of endometrium
TCGA-AX-A1CN	Wild-type	Yes	c54.1	Malignant neoplasm of endometrium
TCGA-AX-A1CP	Wild-type	Yes	c54.1	Malignant neoplasm of endometrium
TCGA-AX-A1CR	Wild-type	Yes	c54.1	Malignant neoplasm of endometrium
TCGA-AX-A2H2	Wild-type	Yes	c54.1	Malignant neoplasm of endometrium
TCGA-AX-A2H4	Wild-type	Yes	c54.1	Malignant neoplasm of endometrium
TCGA-AX-A2H5	Wild-type	Yes	c54.1	Malignant neoplasm of endometrium
TCGA-AX-A2H7	Wild-type	Yes	c54.1	Malignant neoplasm of endometrium
TCGA-AX-A2H8	Wild-type	Yes	c54.1	Malignant neoplasm of endometrium
TCGA-AX-A2HA	Wild-type	Yes	c54.1	Malignant neoplasm of endometrium
TCGA-AX-A2HF	Wild-type	Yes	c54.1	Malignant neoplasm of endometrium
TCGA-AX-A2HG	Wild-type	Yes	c54.1	Malignant neoplasm of endometrium
TCGA-AX-A2HH	Wild-type	Yes	c54.1	Malignant neoplasm of endometrium
TCGA-AX-A2HJ	Wild-type	Yes	c54.1	Malignant neoplasm of endometrium
TCGA-AX-A2HK	Wild-type	Yes	c54.1	Malignant neoplasm of endometrium
TCGA-AX-A2IN	Wild-type	Yes	c54.1	Malignant neoplasm of endometrium
TCGA-AX-A2IO	Wild-type	Yes	c54.1	Malignant neoplasm of endometrium
TCGA-AX-A3FS	Wild-type	Yes	c54.1	Malignant neoplasm of endometrium
TCGA-AX-A3FT	Wild-type	Yes	c54.1	Malignant neoplasm of endometrium
TCGA-AX-A3FV	Wild-type	Yes	c54.1	Malignant neoplasm of endometrium
TCGA-AX-A3FW	Wild-type	Yes	c54.1	Malignant neoplasm of endometrium
TCGA-AX-A3FX	Wild-type	Yes	c54.1	Malignant neoplasm of endometrium
TCGA-AX-A3FZ	Wild-type	Yes	c54.1	Malignant neoplasm of endometrium
TCGA-AX-A3G1	Wild-type	Yes	c54.1	Malignant neoplasm of endometrium
TCGA-AX-A3G3	Wild-type	Yes	c54.1	Malignant neoplasm of endometrium
TCGA-AX-A3G4	Wild-type	Yes	c54.1	Malignant neoplasm of endometrium
TCGA-AX-A3G6	Wild-type	Yes	c54.1	Malignant neoplasm of endometrium
TCGA-AX-A3G7	Wild-type	Yes	c54.1	Malignant neoplasm of endometrium
TCGA-AX-A3G8	Wild-type	Yes	c54.1	Malignant neoplasm of endometrium
TCGA-AX-A3G9	Wild-type	Yes	c54.1	Malignant neoplasm of endometrium
TCGA-AX-A3GB	Wild-type	Yes	c54.1	Malignant neoplasm of endometrium
TCGA-AX-A3GI	Wild-type	Yes	c54.1	Malignant neoplasm of endometrium
TCGA-B5-A0JN	Wild-type	Yes	c54.1	Malignant neoplasm of endometrium
TCGA-B5-A0JR	Wild-type	Yes	c54.1	Malignant neoplasm of endometrium
TCGA-B5-A0JS	Wild-type	Yes	c54.1	Malignant neoplasm of endometrium
TCGA-B5-A0JT	Wild-type	Yes	c54.1	Malignant neoplasm of endometrium
TCGA-B5-A0JU	Wild-type	Yes	c54.1	Malignant neoplasm of endometrium
TCGA-B5-A0JV	Wild-type	Yes	c54.1	Malignant neoplasm of endometrium
TCGA-B5-A0JX	Wild-type	Yes	c54.1	Malignant neoplasm of endometrium
TCGA-B5-A0JZ	Wild-type	Yes	c54.1	Malignant neoplasm of endometrium
TCGA-B5-A0K0	Wild-type	Yes	c54.1	Malignant neoplasm of endometrium
TCGA-B5-A0K1	Wild-type	Yes	c54.1	Malignant neoplasm of endometrium
TCGA-B5-A0K2	Wild-type	Yes	c54.1	Malignant neoplasm of endometrium
TCGA-B5-A0K3	Wild-type	Yes	c54.1	Malignant neoplasm of endometrium
TCGA-B5-A0K4	Wild-type	Yes	c54.1	Malignant neoplasm of endometrium
TCGA-B5-A0K6	Wild-type	Yes	c54.1	Malignant neoplasm of endometrium
TCGA-B5-A0K7	Wild-type	Yes	c54.1	Malignant neoplasm of endometrium
TCGA-B5-A0K8	Wild-type	Yes	c54.1	Malignant neoplasm of endometrium
TCGA-B5-A0K9	Wild-type	Yes	c54.1	Malignant neoplasm of endometrium
TCGA-B5-A0KB	Wild-type	Yes	c54.1	Malignant neoplasm of endometrium
TCGA-B5-A11H	Wild-type	Yes	c54.1	Malignant neoplasm of endometrium
TCGA-B5-A11I	Wild-type	Yes	c54.1	Malignant neoplasm of endometrium
TCGA-B5-A11J	Wild-type	Yes	c54.1	Malignant neoplasm of endometrium
TCGA-B5-A11L	Wild-type	Yes	c54.1	Malignant neoplasm of endometrium
TCGA-B5-A11M	Wild-type	Yes	c54.1	Malignant neoplasm of endometrium
TCGA-B5-A11O	Wild-type	Yes	c54.1	Malignant neoplasm of endometrium
TCGA-B5-A11P	Wild-type	Yes	c54.1	Malignant neoplasm of endometrium
TCGA-B5-A11Q	Wild-type	Yes	c54.1	Malignant neoplasm of endometrium
TCGA-B5-A11R	Wild-type	Yes	c54.1	Malignant neoplasm of endometrium
TCGA-B5-A11S	Wild-type	Yes	c54.1	Malignant neoplasm of endometrium
TCGA-B5-A11U	Wild-type	Yes	c54.1	Malignant neoplasm of endometrium
TCGA-B5-A11V	Wild-type	Yes	c54.1	Malignant neoplasm of endometrium
TCGA-B5-A11W	Wild-type	Yes	c54.1	Malignant neoplasm of endometrium
TCGA-B5-A11X	Wild-type	Yes	c54.1	Malignant neoplasm of endometrium
TCGA-B5-A11Y	Wild-type	Yes	c54.1	Malignant neoplasm of endometrium
TCGA-B5-A11Z	Wild-type	Yes	c54.1	Malignant neoplasm of endometrium
TCGA-B5-A121	Wild-type	Yes	c54.1	Malignant neoplasm of endometrium
TCGA-B5-A1MS	Wild-type	Yes	c54.1	Malignant neoplasm of endometrium
TCGA-B5-A1MU	Wild-type	Yes	c54.1	Malignant neoplasm of endometrium
TCGA-B5-A1MV	Wild-type	Yes	c54.1	Malignant neoplasm of endometrium
TCGA-B5-A1MW	Wild-type	Yes	c54.1	Malignant neoplasm of endometrium
TCGA-B5-A1MY	Wild-type	Yes	c54.1	Malignant neoplasm of endometrium
TCGA-B5-A1MZ	Wild-type	Yes	c54.1	Malignant neoplasm of endometrium
TCGA-B5-A1N2	Wild-type	Yes	c54.1	Malignant neoplasm of endometrium
TCGA-B5-A3FB	Wild-type	Yes	c54.1	Malignant neoplasm of endometrium
TCGA-B5-A3FD	Wild-type	Yes	c54.1	Malignant neoplasm of endometrium
TCGA-B5-A3FH	Wild-type	Yes	c54.1	Malignant neoplasm of endometrium
TCGA-B5-A3S1	Wild-type	Yes	c54.1	Malignant neoplasm of endometrium
TCGA-B5-A5OC	Wild-type	Yes	c54.1	Malignant neoplasm of endometrium
TCGA-B5-A5OD	Wild-type	Yes	c54.1	Malignant neoplasm of endometrium
TCGA-B5-A5OE	Wild-type	Yes	c54.1	Malignant neoplasm of endometrium
TCGA-BG-A0LW	Wild-type	Yes	c54.1	Malignant neoplasm of endometrium
TCGA-BG-A0LX	Wild-type	Yes	c54.1	Malignant neoplasm of endometrium
TCGA-BG-A0M0	Wild-type	Yes	c54.1	Malignant neoplasm of endometrium
TCGA-BG-A0M2	Wild-type	Yes	c54.1	Malignant neoplasm of endometrium
TCGA-BG-A0M3	Wild-type	Yes	c54.1	Malignant neoplasm of endometrium
TCGA-BG-A0M4	Wild-type	Yes	c54.1	Malignant neoplasm of endometrium
TCGA-BG-A0M6	Wild-type	Yes	c54.1	Malignant neoplasm of endometrium
TCGA-BG-A0M7	Wild-type	Yes	c54.1	Malignant neoplasm of endometrium
TCGA-BG-A0M8	Wild-type	Yes	c54.1	Malignant neoplasm of endometrium
TCGA-BG-A0M9	Wild-type	Yes	c54.1	Malignant neoplasm of endometrium
TCGA-BG-A0MA	Wild-type	Yes	c54.1	Malignant neoplasm of endometrium
TCGA-BG-A0MC	Wild-type	Yes	c54.1	Malignant neoplasm of endometrium
TCGA-BG-A0MG	Wild-type	Yes	c54.1	Malignant neoplasm of endometrium
TCGA-BG-A0MH	Wild-type	Yes	c54.1	Malignant neoplasm of endometrium
TCGA-BG-A0MI	Wild-type	Yes	c54.1	Malignant neoplasm of endometrium
TCGA-BG-A0MK	Wild-type	Yes	c54.1	Malignant neoplasm of endometrium
TCGA-BG-A0MO	Wild-type	Yes	c54.1	Malignant neoplasm of endometrium
TCGA-BG-A0MQ	Wild-type	Yes	c54.1	Malignant neoplasm of endometrium
TCGA-BG-A0MS	Wild-type	Yes	c54.1	Malignant neoplasm of endometrium
TCGA-BG-A0MT	Wild-type	Yes	c54.1	Malignant neoplasm of endometrium
TCGA-BG-A0MU	Wild-type	Yes	c54.1	Malignant neoplasm of endometrium
TCGA-BG-A0RY	Wild-type	Yes	c54.1	Malignant neoplasm of endometrium
TCGA-BG-A0VT	Wild-type	Yes	c54.1	Malignant neoplasm of endometrium
TCGA-BG-A0VV	Wild-type	Yes	c54.1	Malignant neoplasm of endometrium
TCGA-BG-A0VW	Wild-type	Yes	c54.1	Malignant neoplasm of endometrium
TCGA-BG-A0VX	Wild-type	Yes	c54.1	Malignant neoplasm of endometrium
TCGA-BG-A0VZ	Wild-type	Yes	c54.1	Malignant neoplasm of endometrium
TCGA-BG-A0W1	Wild-type	Yes	c54.1	Malignant neoplasm of endometrium
TCGA-BG-A0W2	Wild-type	Yes	c54.1	Malignant neoplasm of endometrium
TCGA-BG-A0YU	Wild-type	Yes	c54.1	Malignant neoplasm of endometrium
TCGA-BG-A0YV	Wild-type	Yes	c54.1	Malignant neoplasm of endometrium
TCGA-BG-A186	Wild-type	Yes	c54.1	Malignant neoplasm of endometrium
TCGA-BG-A187	Wild-type	Yes	c54.1	Malignant neoplasm of endometrium
TCGA-BG-A18A	Wild-type	Yes	c54.1	Malignant neoplasm of endometrium
TCGA-BG-A18B	Wild-type	Yes	c54.1	Malignant neoplasm of endometrium
TCGA-BG-A18C	Wild-type	Yes	c54.1	Malignant neoplasm of endometrium
TCGA-BG-A2AD	Wild-type	Yes	c54.1	Malignant neoplasm of endometrium
TCGA-BG-A2AE	Wild-type	Yes	c54.1	Malignant neoplasm of endometrium
TCGA-BG-A2L7	Wild-type	Yes	c54.1	Malignant neoplasm of endometrium
TCGA-BG-A3EW	Wild-type	Yes	c54.1	Malignant neoplasm of endometrium
TCGA-BG-A3PP	Wild-type	Yes	c54.1	Malignant neoplasm of endometrium
TCGA-BK-A0C9	Wild-type	Yes	c54.1	Malignant neoplasm of endometrium
TCGA-BK-A0CA	Wild-type	Yes	c54.1	Malignant neoplasm of endometrium
TCGA-BK-A0CB	Wild-type	Yes	c54.1	Malignant neoplasm of endometrium
TCGA-BK-A0CC	Wild-type	Yes	c54.1	Malignant neoplasm of endometrium
TCGA-BK-A139	Wild-type	Yes	c54.1	Malignant neoplasm of endometrium
TCGA-BK-A13B	Wild-type	Yes	c54.1	Malignant neoplasm of endometrium
TCGA-BK-A13C	Wild-type	Yes	c54.1	Malignant neoplasm of endometrium
TCGA-BK-A26L	Wild-type	Yes	c54.1	Malignant neoplasm of endometrium
TCGA-BK-A4ZD	Wild-type	Yes	c54.1	Malignant neoplasm of endometrium
TCGA-BK-A56F	Wild-type	Yes	c54.1	Malignant neoplasm of endometrium
TCGA-BK-A6W4	Wild-type	Yes	c54.1	Malignant neoplasm of endometrium
TCGA-BS-A0T9	Wild-type	Yes	c54.1	Malignant neoplasm of endometrium
TCGA-BS-A0TC	Wild-type	Yes	c54.3	Malignant neoplasm of fundus uteri
TCGA-BS-A0TD	Wild-type	Yes	c54.9	Malignant neoplasm of corpus uteri, unspecified
TCGA-BS-A0TE	Wild-type	Yes	c54.9	Malignant neoplasm of corpus uteri, unspecified
TCGA-BS-A0TG	Wild-type	Yes	c54.1	Malignant neoplasm of endometrium
TCGA-BS-A0TI	Wild-type	Yes	c54.1	Malignant neoplasm of endometrium
TCGA-BS-A0U5	Wild-type	Yes	c54.1	Malignant neoplasm of endometrium
TCGA-BS-A0U7	Wild-type	Yes	c54.1	Malignant neoplasm of endometrium
TCGA-BS-A0U8	Wild-type	Yes	c54.1	Malignant neoplasm of endometrium
TCGA-BS-A0U9	Wild-type	Yes	c54.1	Malignant neoplasm of endometrium
TCGA-BS-A0UA	Wild-type	Yes	c54.1	Malignant neoplasm of endometrium
TCGA-BS-A0UL	Wild-type	Yes	c54.1	Malignant neoplasm of endometrium
TCGA-BS-A0UM	Wild-type	Yes	c54.1	Malignant neoplasm of endometrium
TCGA-BS-A0UT	Wild-type	Yes	c54.1	Malignant neoplasm of endometrium
TCGA-BS-A0V4	Wild-type	Yes	c54.1	Malignant neoplasm of endometrium
TCGA-BS-A0V6	Wild-type	Yes	c54.1	Malignant neoplasm of endometrium
TCGA-BS-A0V7	Wild-type	Yes	c54.1	Malignant neoplasm of endometrium
TCGA-BS-A0V8	Wild-type	Yes	c54.1	Malignant neoplasm of endometrium
TCGA-BS-A0VI	Wild-type	Yes	c54.1	Malignant neoplasm of endometrium
TCGA-BS-A0WQ	Wild-type	Yes	c54.1	Malignant neoplasm of endometrium
TCGA-D1-A0ZN	Wild-type	Yes	c54.1	Malignant neoplasm of endometrium
TCGA-D1-A0ZO	Wild-type	Yes	c54.1	Malignant neoplasm of endometrium
TCGA-D1-A0ZP	Wild-type	Yes	c54.1	Malignant neoplasm of endometrium
TCGA-D1-A0ZQ	Wild-type	Yes	c54.1	Malignant neoplasm of endometrium
TCGA-D1-A0ZS	Wild-type	Yes	c54.1	Malignant neoplasm of endometrium
TCGA-D1-A0ZU	Wild-type	Yes	c54.1	Malignant neoplasm of endometrium
TCGA-D1-A0ZV	Wild-type	Yes	c54.1	Malignant neoplasm of endometrium
TCGA-D1-A0ZZ	Wild-type	Yes	c54.1	Malignant neoplasm of endometrium
TCGA-D1-A101	Wild-type	Yes	c54.1	Malignant neoplasm of endometrium
TCGA-D1-A102	Wild-type	Yes	c54.1	Malignant neoplasm of endometrium
TCGA-D1-A15V	Wild-type	Yes	c54.1	Malignant neoplasm of endometrium
TCGA-D1-A15W	Wild-type	Yes	c54.1	Malignant neoplasm of endometrium
TCGA-D1-A15X	Wild-type	Yes	c54.1	Malignant neoplasm of endometrium
TCGA-D1-A15Z	Wild-type	Yes	c54.1	Malignant neoplasm of endometrium
TCGA-D1-A160	Wild-type	Yes	c54.1	Malignant neoplasm of endometrium
TCGA-D1-A162	Wild-type	Yes	c54.1	Malignant neoplasm of endometrium
TCGA-D1-A163	Wild-type	Yes	c54.1	Malignant neoplasm of endometrium
TCGA-D1-A165	Wild-type	Yes	c54.1	Malignant neoplasm of endometrium
TCGA-D1-A168	Wild-type	Yes	c54.1	Malignant neoplasm of endometrium
TCGA-D1-A169	Wild-type	Yes	c54.1	Malignant neoplasm of endometrium
TCGA-D1-A16B	Wild-type	Yes	c54.1	Malignant neoplasm of endometrium
TCGA-D1-A16D	Wild-type	Yes	c54.1	Malignant neoplasm of endometrium
TCGA-D1-A16E	Wild-type	Yes	c54.1	Malignant neoplasm of endometrium
TCGA-D1-A16G	Wild-type	Yes	c54.1	Malignant neoplasm of endometrium
TCGA-D1-A16I	Wild-type	Yes	c54.1	Malignant neoplasm of endometrium
TCGA-D1-A16J	Wild-type	Yes	c54.1	Malignant neoplasm of endometrium
TCGA-D1-A16N	Wild-type	Yes	c54.1	Malignant neoplasm of endometrium
TCGA-D1-A16O	Wild-type	Yes	c54.1	Malignant neoplasm of endometrium
TCGA-D1-A16Q	Wild-type	Yes	c54.1	Malignant neoplasm of endometrium
TCGA-D1-A16R	Wild-type	Yes	c54.1	Malignant neoplasm of endometrium
TCGA-D1-A16S	Wild-type	Yes	c54.1	Malignant neoplasm of endometrium
TCGA-D1-A16V	Wild-type	Yes	c54.1	Malignant neoplasm of endometrium
TCGA-D1-A16Y	Wild-type	Yes	c54.1	Malignant neoplasm of endometrium
TCGA-D1-A174	Wild-type	Yes	c54.1	Malignant neoplasm of endometrium
TCGA-D1-A175	Wild-type	Yes	c54.1	Malignant neoplasm of endometrium
TCGA-D1-A176	Wild-type	Yes	c54.1	Malignant neoplasm of endometrium
TCGA-D1-A177	Wild-type	Yes	c54.1	Malignant neoplasm of endometrium
TCGA-D1-A179	Wild-type	Yes	c54.1	Malignant neoplasm of endometrium
TCGA-D1-A17A	Wild-type	Yes	c54.1	Malignant neoplasm of endometrium
TCGA-D1-A17B	Wild-type	Yes	c54.1	Malignant neoplasm of endometrium
TCGA-D1-A17C	Wild-type	Yes	c54.1	Malignant neoplasm of endometrium
TCGA-D1-A17D	Wild-type	Yes	c54.1	Malignant neoplasm of endometrium
TCGA-D1-A17F	Wild-type	Yes	c54.1	Malignant neoplasm of endometrium
TCGA-D1-A17H	Wild-type	Yes	c54.1	Malignant neoplasm of endometrium
TCGA-D1-A17K	Wild-type	Yes	c54.1	Malignant neoplasm of endometrium
TCGA-D1-A17L	Wild-type	Yes	c54.1	Malignant neoplasm of endometrium
TCGA-D1-A17M	Wild-type	Yes	c54.1	Malignant neoplasm of endometrium
TCGA-D1-A17N	Wild-type	Yes	c54.1	Malignant neoplasm of endometrium
TCGA-D1-A17R	Wild-type	Yes	c54.1	Malignant neoplasm of endometrium
TCGA-D1-A17S	Wild-type	Yes	c54.1	Malignant neoplasm of endometrium
TCGA-D1-A17T	Wild-type	Yes	c54.1	Malignant neoplasm of endometrium
TCGA-D1-A17U	Wild-type	Yes	c54.1	Malignant neoplasm of endometrium
TCGA-D1-A1NU	Wild-type	Yes	c54.1	Malignant neoplasm of endometrium
TCGA-D1-A1NW	Wild-type	Yes	c54.1	Malignant neoplasm of endometrium
TCGA-D1-A1NX	Wild-type	Yes	c54.1	Malignant neoplasm of endometrium
TCGA-D1-A1NY	Wild-type	Yes	c54.1	Malignant neoplasm of endometrium
TCGA-D1-A1NZ	Wild-type	Yes	c54.1	Malignant neoplasm of endometrium
TCGA-D1-A1O0	Wild-type	Yes	c54.1	Malignant neoplasm of endometrium
TCGA-D1-A1O5	Wild-type	Yes	c54.1	Malignant neoplasm of endometrium
TCGA-D1-A1O7	Wild-type	Yes	c54.1	Malignant neoplasm of endometrium
TCGA-D1-A1O8	Wild-type	Yes	c54.1	Malignant neoplasm of endometrium
TCGA-D1-A2G0	Wild-type	Yes	c54.1	Malignant neoplasm of endometrium
TCGA-D1-A2G5	Wild-type	Yes	c54.1	Malignant neoplasm of endometrium
TCGA-D1-A2G6	Wild-type	Yes	c54.1	Malignant neoplasm of endometrium
TCGA-D1-A2G7	Wild-type	Yes	c54.1	Malignant neoplasm of endometrium
TCGA-D1-A3DA	Wild-type	Yes	c54.1	Malignant neoplasm of endometrium
TCGA-D1-A3DG	Wild-type	Yes	c54.1	Malignant neoplasm of endometrium
TCGA-D1-A3DH	Wild-type	Yes	c54.1	Malignant neoplasm of endometrium
TCGA-D1-A3JP	Wild-type	Yes	c54.1	Malignant neoplasm of endometrium
TCGA-D1-A3JQ	Wild-type	Yes	c54.1	Malignant neoplasm of endometrium
TCGA-DF-A2KR	Wild-type	Yes	c54.1	Malignant neoplasm of endometrium
TCGA-DF-A2KS	Wild-type	Yes	c54.1	Malignant neoplasm of endometrium
TCGA-DF-A2KV	Wild-type	Yes	c54.1	Malignant neoplasm of endometrium
TCGA-DF-A2KY	Wild-type	Yes	c54.1	Malignant neoplasm of endometrium
TCGA-DF-A2KZ	Wild-type	Yes	c54.1	Malignant neoplasm of endometrium
TCGA-DF-A2L0	Wild-type	Yes	c54.1	Malignant neoplasm of endometrium
TCGA-DI-A0WH	Wild-type	Yes	c54.1	Malignant neoplasm of endometrium
TCGA-DI-A1BY	Wild-type	Yes	c54.1	Malignant neoplasm of endometrium
TCGA-DI-A1NN	Wild-type	Yes	c54.1	Malignant neoplasm of endometrium
TCGA-DI-A1NO	Wild-type	Yes	c54.1	Malignant neoplasm of endometrium
TCGA-DI-A2QT	Wild-type	Yes	c54.1	Malignant neoplasm of endometrium
TCGA-DI-A2QU	Wild-type	Yes	c54.1	Malignant neoplasm of endometrium
TCGA-DI-A2QY	Wild-type	Yes	c54.1	Malignant neoplasm of endometrium
TCGA-E6-A1LZ	Wild-type	Yes	c54.1	Malignant neoplasm of endometrium
TCGA-E6-A1M0	Wild-type	Yes	c54.1	Malignant neoplasm of endometrium
TCGA-E6-A2P8	Wild-type	Yes	c54.1	Malignant neoplasm of endometrium
TCGA-E6-A2P9	Wild-type	Yes	c54.1	Malignant neoplasm of endometrium
TCGA-E6-A8L9	Wild-type	Yes	c54.1	Malignant neoplasm of endometrium
TCGA-EC-A1NJ	Wild-type	Yes	c54.1	Malignant neoplasm of endometrium
TCGA-EC-A1QX	Wild-type	Yes	c54.1	Malignant neoplasm of endometrium
TCGA-EC-A24G	Wild-type	Yes	c54.1	Malignant neoplasm of endometrium
TCGA-EO-A1Y5	Wild-type	Yes	c54.1	Malignant neoplasm of endometrium
TCGA-EO-A1Y7	Wild-type	Yes	c54.1	Malignant neoplasm of endometrium
TCGA-EO-A1Y8	Wild-type	Yes	c54.1	Malignant neoplasm of endometrium
TCGA-EO-A22S	Wild-type	Yes	c54.1	Malignant neoplasm of endometrium
TCGA-EO-A22T	Wild-type	Yes	c54.1	Malignant neoplasm of endometrium
TCGA-EO-A22Y	Wild-type	Yes	c54.1	Malignant neoplasm of endometrium
TCGA-EO-A2CG	Wild-type	Yes	c54.1	Malignant neoplasm of endometrium
TCGA-EO-A2CH	Wild-type	Yes	c54.1	Malignant neoplasm of endometrium
TCGA-EO-A3AS	Wild-type	Yes	c54.1	Malignant neoplasm of endometrium
TCGA-EO-A3AU	Wild-type	Yes	c54.1	Malignant neoplasm of endometrium
TCGA-EO-A3AV	Wild-type	Yes	c54.1	Malignant neoplasm of endometrium
TCGA-EO-A3B1	Wild-type	Yes	c54.1	Malignant neoplasm of endometrium
TCGA-EO-A3KU	Wild-type	Yes	c54.1	Malignant neoplasm of endometrium
TCGA-EO-A3KW	Wild-type	Yes	c54.1	Malignant neoplasm of endometrium
TCGA-EO-A3KX	Wild-type	Yes	c54.1	Malignant neoplasm of endometrium
TCGA-EO-A3L0	Wild-type	Yes	c54.1	Malignant neoplasm of endometrium
TCGA-EY-A1G7	Wild-type	Yes	c54.1	Malignant neoplasm of endometrium
TCGA-EY-A1G8	Wild-type	Yes	c54.1	Malignant neoplasm of endometrium
TCGA-EY-A1GC	Wild-type	Yes	c54.1	Malignant neoplasm of endometrium
TCGA-EY-A1GD	Wild-type	Yes	c54.1	Malignant neoplasm of endometrium
TCGA-EY-A1GE	Wild-type	Yes	c54.1	Malignant neoplasm of endometrium
TCGA-EY-A1GF	Wild-type	Yes	c54.1	Malignant neoplasm of endometrium
TCGA-EY-A1GH	Wild-type	Yes	c54.1	Malignant neoplasm of endometrium
TCGA-EY-A1GK	Wild-type	Yes	c54.1	Malignant neoplasm of endometrium
TCGA-EY-A1GL	Wild-type	Yes	c54.1	Malignant neoplasm of endometrium
TCGA-EY-A1GM	Wild-type	Yes	c54.1	Malignant neoplasm of endometrium
TCGA-EY-A1GO	Wild-type	Yes	c54.1	Malignant neoplasm of endometrium
TCGA-EY-A1GP	Wild-type	Yes	c54.1	Malignant neoplasm of endometrium
TCGA-EY-A1GQ	Wild-type	Yes	c54.1	Malignant neoplasm of endometrium
TCGA-EY-A1GR	Wild-type	Yes	c54.1	Malignant neoplasm of endometrium
TCGA-EY-A1GS	Wild-type	Yes	c54.1	Malignant neoplasm of endometrium
TCGA-EY-A1GT	Wild-type	Yes	c54.1	Malignant neoplasm of endometrium
TCGA-EY-A1GU	Wild-type	Yes	c54.1	Malignant neoplasm of endometrium
TCGA-EY-A1GV	Wild-type	Yes	c54.1	Malignant neoplasm of endometrium
TCGA-EY-A1GW	Wild-type	Yes	c54.1	Malignant neoplasm of endometrium
TCGA-EY-A1GX	Wild-type	Yes	c54.1	Malignant neoplasm of endometrium
TCGA-EY-A1H0	Wild-type	Yes	c54.1	Malignant neoplasm of endometrium
TCGA-EY-A210	Wild-type	Yes	c54.1	Malignant neoplasm of endometrium
TCGA-EY-A212	Wild-type	Yes	c54.1	Malignant neoplasm of endometrium
TCGA-EY-A214	Wild-type	Yes	c54.1	Malignant neoplasm of endometrium
TCGA-EY-A215	Wild-type	Yes	c54.1	Malignant neoplasm of endometrium
TCGA-EY-A2OM	Wild-type	Yes	c54.1	Malignant neoplasm of endometrium
TCGA-EY-A2ON	Wild-type	Yes	c54.1	Malignant neoplasm of endometrium
TCGA-EY-A2OO	Wild-type	Yes	c54.1	Malignant neoplasm of endometrium
TCGA-EY-A2OP	Wild-type	Yes	c54.1	Malignant neoplasm of endometrium
TCGA-EY-A2OQ	Wild-type	Yes	c54.1	Malignant neoplasm of endometrium
TCGA-EY-A3L3	Wild-type	Yes	c54.1	Malignant neoplasm of endometrium
TCGA-EY-A3QX	Wild-type	Yes	c54.1	Malignant neoplasm of endometrium
TCGA-EY-A4KR	Wild-type	Yes	c54.1	Malignant neoplasm of endometrium
TCGA-EY-A547	Wild-type	Yes	c54.1	Malignant neoplasm of endometrium
TCGA-EY-A549	Wild-type	Yes	c54.9	Malignant neoplasm of corpus uteri, unspecified
TCGA-EY-A54A	Wild-type	Yes	c54.9	Malignant neoplasm of corpus uteri, unspecified
TCGA-EY-A5W2	Wild-type	Yes	c54.1	Malignant neoplasm of endometrium
TCGA-EY-A72D	Wild-type	Yes	c54.1	Malignant neoplasm of endometrium
TCGA-FI-A2CX	Wild-type	Yes	c54.1	Malignant neoplasm of endometrium
TCGA-FI-A2CY	Wild-type	Yes	c54.1	Malignant neoplasm of endometrium
TCGA-FI-A2D2	Wild-type	Yes	c54.1	Malignant neoplasm of endometrium
TCGA-FI-A2D4	Wild-type	Yes	c54.1	Malignant neoplasm of endometrium
TCGA-FI-A2D6	Wild-type	Yes	c54.1	Malignant neoplasm of endometrium
TCGA-FI-A2EU	Wild-type	Yes	c54.1	Malignant neoplasm of endometrium
TCGA-FI-A2EX	Wild-type	Yes	c54.1	Malignant neoplasm of endometrium
TCGA-FI-A2EY	Wild-type	Yes	c54.1	Malignant neoplasm of endometrium
TCGA-FI-A2F4	Wild-type	Yes	c54.1	Malignant neoplasm of endometrium
TCGA-FI-A2F8	Wild-type	Yes	c54.1	Malignant neoplasm of endometrium
TCGA-FI-A2F9	Wild-type	Yes	c54.1	Malignant neoplasm of endometrium
TCGA-FI-A3PV	Wild-type	Yes	c54.1	Malignant neoplasm of endometrium
TCGA-FI-A3PX	Wild-type	Yes	c54.1	Malignant neoplasm of endometrium
TCGA-H5-A2HR	Wild-type	Yes	c54.1	Malignant neoplasm of endometrium
TCGA-JU-AAVI	Wild-type	Yes	c54.1	Malignant neoplasm of endometrium
TCGA-K6-A3WQ	Wild-type	Yes	c54.1	Malignant neoplasm of endometrium
TCGA-KJ-A3U4	Wild-type	Yes	c54.1	Malignant neoplasm of endometrium
TCGA-KP-A3VZ	Wild-type	Yes	c54.1	Malignant neoplasm of endometrium
TCGA-KP-A3W0	Wild-type	Yes	c54.1	Malignant neoplasm of endometrium
TCGA-KP-A3W1	Wild-type	Yes	c54.1	Malignant neoplasm of endometrium
TCGA-KP-A3W3	Wild-type	Yes	c54.1	Malignant neoplasm of endometrium
TCGA-KP-A3W4	Wild-type	Yes	c54.1	Malignant neoplasm of endometrium
TCGA-PG-A5BC	Wild-type	Yes	c54.1	Malignant neoplasm of endometrium
TCGA-PG-A6IB	Wild-type	Yes	c54.1	Malignant neoplasm of endometrium
TCGA-PG-A7D5	Wild-type	Yes	c54.1	Malignant neoplasm of endometrium
TCGA-PG-A914	Wild-type	Yes	c54.1	Malignant neoplasm of endometrium
TCGA-PG-A915	Wild-type	Yes	c54.1	Malignant neoplasm of endometrium
TCGA-PG-A916	Wild-type	Yes	c54.1	Malignant neoplasm of endometrium
TCGA-QF-A5YT	Wild-type	Yes	c54.0	Malignant neoplasm of isthmus uteri
TCGA-QS-A5YQ	Wild-type	Yes	c54.1	Malignant neoplasm of endometrium
TCGA-QS-A5YR	Wild-type	Yes	c54.1	Malignant neoplasm of endometrium
TCGA-QS-A744	Wild-type	Yes	c54.0	Malignant neoplasm of isthmus uteri
TCGA-QS-A8F1	Wild-type	Yes	c54.3	Malignant neoplasm of fundus uteri
TCGA-SJ-A6ZI	Wild-type	Yes	c54.1	Malignant neoplasm of endometrium
TCGA-SJ-A6ZJ	Wild-type	Yes	c54.1	Malignant neoplasm of endometrium
TCGA-SL-A6J9	Wild-type	Yes	c54.1	Malignant neoplasm of endometrium
TCGA-SL-A6JA	Wild-type	Yes	c54.1	Malignant neoplasm of endometrium
