# Supplementary material for: In silico analysis reveals a shared immune signature in CASP8-mutated carcinomas with varying correlations to prognosis
Source: PeerJ. 2019 Feb 11;7:e6402. doi: 10.7717/peerj.6402 (PMC6375258; doi:10.7717/peerj.6402)
Supplement: Table S3 — The tables list the enrichment of specific biological processes among the genes significantly differentially expressed between CASP8-WT and CASP8-MT HNSCs. [file peerj-07-6402-s005.xlsx]

## Sheet: FDR<0.001
Supplemental Table S3. Results of Gene Ontology analysis. The tables list the enrichment of specific biological processes among the genes significantly differentially expressed between CASP8-WT and CASP8-MT HNSCs.
Analysis Type:	PANTHER Overrepresentation Test (Released 20171205)
Annotation Version and Release Date:	PANTHER version 13.1 Released 2018-02-03
Analyzed List:	upload_1 (Homo sapiens)
Reference List:	Homo sapiens (all genes in database)
Test Type:	BINOMIAL
Bonferroni correction:	TRUE
Bonferroni count:	234
PANTHER GO-Slim Biological Process	Homo sapiens - REFLIST (21042)	upload_1 (2467)	upload_1 (expected)	upload_1 (over/under)	upload_1 (fold Enrichment)	upload_1 (P-value)
cellular defense response (GO:0006968)	105	28	12.31	+	2.27	0.019
synaptic transmission (GO:0007268)	382	78	44.79	+	1.74	0.000811
MAPK cascade (GO:0000165)	340	68	39.86	+	1.71	0.00622
cell-cell signaling (GO:0007267)	569	112	66.71	+	1.68	4.02e-05
cellular component movement (GO:0006928)	480	86	56.28	+	1.53	0.0268
developmental process (GO:0032502)	1501	252	175.98	+	1.43	2.72e-06
intracellular signal transduction (GO:0035556)	1071	172	125.57	+	1.37	0.00713
cell communication (GO:0007154)	2686	389	314.91	+	1.24	0.00189
regulation of biological process (GO:0050789)	2463	354	288.77	+	1.23	0.00946
biological regulation (GO:0065007)	2985	425	349.97	+	1.21	0.00325
cellular process (GO:0009987)	8247	1057	966.89	+	1.09	0.0274
Unclassified (UNCLASSIFIED)	10206	1083	1196.57	-	0.91	0
sensory perception (GO:0007600)	424	24	49.71	-	0.48	0.0082
sensory perception of chemical stimulus (GO:0007606)	282	5	33.06	-	0.15	3.36e-07
sensory perception of smell (GO:0007608)	240	2	28.14	-	0.07	5.21e-08

## Sheet: FDR<0.001, logFC<-1.3
Analysis Type:	PANTHER Overrepresentation Test (Released 20171205)
Annotation Version and Release Date:	PANTHER version 13.1 Released 2018-02-03
Analyzed List:	upload_1 (Homo sapiens)
Reference List:	Homo sapiens (all genes in database)
Test Type:	BINOMIAL
Bonferroni correction:	TRUE
Bonferroni count:	234
PANTHER GO-Slim Biological Process	Homo sapiens - REFLIST (21042)	upload_1 (787)	upload_1 (expected)	upload_1 (over/under)	upload_1 (fold Enrichment)	upload_1 (P-value)
neuron-neuron synaptic transmission (GO:0007270)	85	19	3.18	+	5.98	2.85e-07
synaptic vesicle exocytosis (GO:0016079)	58	11	2.17	+	5.07	0.0039
muscle contraction (GO:0006936)	114	16	4.26	+	3.75	0.00229
synaptic transmission (GO:0007268)	382	47	14.29	+	3.29	7.71e-10
cell-cell signaling (GO:0007267)	569	66	21.28	+	3.1	4.29e-13
transmembrane receptor protein tyrosine kinase signaling pathway (GO:0007169)	151	17	5.65	+	3.01	0.0187
mesoderm development (GO:0007498)	269	26	10.06	+	2.58	0.0039
nervous system development (GO:0007399)	314	30	11.74	+	2.55	0.00112
cell differentiation (GO:0030154)	548	49	20.5	+	2.39	8.93e-06
system development (GO:0048731)	452	38	16.91	+	2.25	0.00123
system process (GO:0003008)	1020	81	38.15	+	2.12	7.35e-08
developmental process (GO:0032502)	1501	118	56.14	+	2.1	6.9e-12
neurological system process (GO:0050877)	924	70	34.56	+	2.03	7.93e-06
single-multicellular organism process (GO:0044707)	1665	122	62.27	+	1.96	2.75e-10
multicellular organismal process (GO:0032501)	1684	123	62.98	+	1.95	2.7e-10
cell communication (GO:0007154)	2686	163	100.46	+	1.62	7.68e-08
biological regulation (GO:0065007)	2985	175	111.64	+	1.57	1.95e-07
regulation of biological process (GO:0050789)	2463	143	92.12	+	1.55	1.89e-05
signal transduction (GO:0007165)	2318	126	86.7	+	1.45	0.00329
Unclassified (UNCLASSIFIED)	10206	338	381.72	-	0.89	0

## Sheet: FDR<0.001, logFC>1.3
Analysis Type:	PANTHER Overrepresentation Test (Released 20171205)
Annotation Version and Release Date:	PANTHER version 13.1 Released 2018-02-03
Analyzed List:	upload_1 (Homo sapiens)
Reference List:	Homo sapiens (all genes in database)
Test Type:	BINOMIAL
Bonferroni correction:	TRUE
Bonferroni count:	234
PANTHER GO-Slim Biological Process	Homo sapiens - REFLIST (21042)	upload_1 (83)	upload_1 (expected)	upload_1 (over/under)	upload_1 (fold Enrichment)	upload_1 (P-value)
immune response (GO:0006955)	383	8	1.51	+	5.3	0.033
Unclassified (UNCLASSIFIED)	10206	38	40.26	-	0.94	0

## Sheet: FDR<0.001, logFC+,-1.3
Analysis Type:	PANTHER Overrepresentation Test (Released 20171205)
Annotation Version and Release Date:	PANTHER version 13.1 Released 2018-02-03
Analyzed List:	upload_1 (Homo sapiens)
Reference List:	Homo sapiens (all genes in database)
Test Type:	BINOMIAL
Bonferroni correction:	TRUE
Bonferroni count:	234
PANTHER GO-Slim Biological Process	Homo sapiens - REFLIST (21042)	upload_1 (870)	upload_1 (expected)	upload_1 (over/under)	upload_1 (fold Enrichment)	upload_1 (P-value)
neuron-neuron synaptic transmission (GO:0007270)	85	20	3.51	+	5.69	2.44e-07
synaptic vesicle exocytosis (GO:0016079)	58	11	2.4	+	4.59	0.00962
muscle contraction (GO:0006936)	114	16	4.71	+	3.39	0.00763
synaptic transmission (GO:0007268)	382	51	15.79	+	3.23	1.92e-10
cell-cell signaling (GO:0007267)	569	71	23.53	+	3.02	1.55e-13
transmembrane receptor protein tyrosine kinase signaling pathway (GO:0007169)	151	18	6.24	+	2.88	0.0201
nervous system development (GO:0007399)	314	31	12.98	+	2.39	0.00295
mesoderm development (GO:0007498)	269	26	11.12	+	2.34	0.0201
cell differentiation (GO:0030154)	548	52	22.66	+	2.3	1.29e-05
system development (GO:0048731)	452	41	18.69	+	2.19	0.000969
system process (GO:0003008)	1020	86	42.17	+	2.04	1.57e-07
developmental process (GO:0032502)	1501	126	62.06	+	2.03	1.25e-11
neurological system process (GO:0050877)	924	75	38.2	+	1.96	9.57e-06
single-multicellular organism process (GO:0044707)	1665	135	68.84	+	1.96	1.72e-11
multicellular organismal process (GO:0032501)	1684	136	69.63	+	1.95	1.83e-11
cell communication (GO:0007154)	2686	175	111.06	+	1.58	1.86e-07
biological regulation (GO:0065007)	2985	191	123.42	+	1.55	1.04e-07
regulation of biological process (GO:0050789)	2463	157	101.83	+	1.54	7.31e-06
signal transduction (GO:0007165)	2318	136	95.84	+	1.42	0.00513
Unclassified (UNCLASSIFIED)	10206	376	421.98	-	0.89	0
