# Supplementary material for: In silico analysis reveals a shared immune signature in CASP8-mutated carcinomas with varying correlations to prognosis
Source: PeerJ. 2019 Feb 11;7:e6402. doi: 10.7717/peerj.6402 (PMC6375258; doi:10.7717/peerj.6402)
Supplement: Table S7 — The table lists genes that contribute to core enrichment of gene sets Allograft rejection, Interferon alpha response, and Interferon gamma response in both HNSC and UCSC in the GSEA. [file peerj-07-6402-s009.xlsx]

## Sheet: Shared Immune Signature genes
Supplemental Table S7. The table lists genes that contribute to core enrichment of gene sets Allograft rejection, Interferon alpha response, and Interferon gamma response in both HNSC and UCSC in the GSEA.
Allograft Rejection		Interferon alpha		Interferon gamma
CCL11		B2M		APOL6
CCL4		BATF2		BATF2
CCL5		CASP1		CASP1
CCR2		CCRL2		CCL5
CCR5		CD74		CD274
CD2		CNP		CD38
CD247		CSF1		CD40
CD3D		CXCL10		CD69
CD3E		CXCL11		CD74
CD3G		EPSTI1		CD86
CD40		GBP2		CDKN1A
CD7		GBP4		CIITA
CD74		HLA-C		CXCL10
CD86		IFI27		CXCL11
CD8A		IFI30		CXCL9
CD96		IFI35		EPSTI1
CRTAM		IL15		FAS
CSF1		IRF1		FCGR1A
CXCL13		ISG15		GBP4
CXCL9		ISG20		GCH1
CXCR3		LAP3		GZMA
FAS		OASL		HLA-A
FASLG		PSMB8		HLA-B
FLNA		PSMB9		HLA-DMA
FYB		PSME1		HLA-DQA1
GBP2		PSME2		HLA-DRB1
GPR65		RIPK2		ICAM1
GZMA		TAP1		IDO1
GZMB		TRAFD1		IFI30
HLA-A		TRIM21		IFI35
HLA-DMA		TRIM26		IL10RA
HLA-DOA		TRIM5		IL15
HLA-DQA1		UBA7		IL15RA
HLA-DRA		UBE2L6		IL18BP
HLA-E		WARS		IL2RB
IFNG				IRF1
IL12RB1				IRF4
IL15				IRF8
IL16				ISG20
IL2				ISOC1
IL2RA				ITGB7
IL2RB				JAK2
IL2RG				KLRK1
IRF4				LAP3
IRF8				LCP2
ITGAL				LYSMD2
ITGB2				MT2A
ITK				MVP
JAK2				NLRC5
KLRD1				OASL
LCK				PNP
LCP2				PSMB10
NCR1				PSMB8
PRF1				PSMB9
PSMB10				PSME2
PTPRC				RIPK2
SIT1				SAMHD1
TAP1				SECTM1
TAP2				SLAMF7
TIMP1				STAT1
TRAT1				TAP1
WARS				TRAFD1
WAS				TRIM21
				TRIM25
				UBE2L6
				UPP1
				VAMP5
				WARS
				XAF1
				ZBP1
