# Supplementary material for: In silico analysis reveals a shared immune signature in CASP8-mutated carcinomas with varying correlations to prognosis
Source: PeerJ. 2019 Feb 11;7:e6402. doi: 10.7717/peerj.6402 (PMC6375258; doi:10.7717/peerj.6402)
Supplement: Table S8 — The table shows results of edgeR analysis reported in Table S2 for nine neutrophil-active chemokines. Fold change and statistical significance of the CASP8-MT versus CASP8-WT comparison in both HNSC and UCEC are shown. [file peerj-07-6402-s010.xlsx]

## Sheet: HNSC
Supplemental Table S8. edgeR analysis results for neutrophil-active chemokines. The table shows results of edgeR analysis reported in Supplementary table 2 for nine neutrophil-active chemokines. Fold change and statistical significance of the CASP8-MT versus CASP8-WT comparison in both HNSC and UCEC are shown.
Ensembl	logFC	P-value	FDR	HUGO
ENSG00000163739	0.406659	0.0701668	0.233645	CXCL1
ENSG00000107562	-0.347142	0.142516	0.376558	CXCL12
ENSG00000081041	0.485198	0.0257051	0.113326	CXCL2
ENSG00000163734	0.68559	0.00307619	0.0231558	CXCL3
ENSG00000163735	-0.617802	0.0743975	0.242969	CXCL5
ENSG00000124875	-0.956051	0.00247438	0.019558	CXCL6
ENSG00000169429	-0.4425	0.127573	0.349171	CXCL8
ENSG00000137033	1.34292	7.63747e-08	5.05955e-06	IL33
ENSG00000163736	-0.315206	0.383567	0.70687	PPBP(CXCL7)

## Sheet: UCEC
Ensembl	logFC	P-value	FDR	HUGO
ENSG00000163739	-0.266256	0.440921	0.802159	CXCL1
ENSG00000107562	-0.562439	0.00933377	0.0827237	CXCL12
ENSG00000081041	-0.20795	0.48767	0.840937	CXCL2
ENSG00000163734	-0.0364992	0.92865	1	CXCL3
ENSG00000163735	-0.588254	0.130458	0.419374	CXCL5
ENSG00000124875	-0.920233	0.0167915	0.122401	CXCL6
ENSG00000169429	-0.660841	0.0145576	0.111459	CXCL8
ENSG00000137033	-0.291065	0.215995	0.555964	IL33
ENSG00000163736	-1.00538	0.0516422	0.245558	PPBP(CXCL7)
